# Supplementary material for: Genome-Wide Analysis of the Rab Gene Family in Melilotus albus Reveals Their Role in Salt Tolerance
Source: MDPI journal article supplement (doi:10.3390/ijms24010126), 2022-12-21
Supplement: s1 [file s1]

**Table S5.** Cis-acting elements in promoters of *MaRab* genes in different group.

| Group | auxin-<br>response<br>ive | cell<br>cycle<br>regulati<br>on | defense<br>and<br>stress<br>response<br>iveness | gibbere<br>llin-<br>response<br>iveness | light<br>response<br>iveness | low-<br>temper<br>ature<br>response<br>iveness | salicyli<br>c acid<br>response<br>iveness | abscisic<br>acid<br>response<br>iveness | anaero<br>bic<br>inducti<br>on | auxin<br>response<br>iveness<br>(MYB<br>binding<br>site) | circadia<br>n<br>control | light<br>inducti<br>on<br>(MYB<br>binding<br>site) | seed-<br>specific<br>regulati<br>on | MeJA-<br>response<br>iveness | zein<br>metabo<br>lism<br>regulati<br>on | meriste<br>m<br>express<br>ion | endosp<br>erm<br>express<br>ion | anoxic<br>specific<br>inducib<br>ility | gibbere<br>llin-<br>response<br>ive<br>(MYB<br>binding<br>site) | drough<br>t-<br>inducib<br>ility | flavono<br>id<br>biosynt<br>hetic<br>genes<br>regulati<br>on | light<br>inducti<br>on | MYBH<br>v1<br>binding<br>site | wound-<br>response<br>ive<br>elemen<br>t | Total |
|-------|---------------------------|---------------------------------|-------------------------------------------------|-----------------------------------------|------------------------------|------------------------------------------------|-------------------------------------------|-----------------------------------------|--------------------------------|----------------------------------------------------------|--------------------------|----------------------------------------------------|-------------------------------------|------------------------------|------------------------------------------|--------------------------------|---------------------------------|----------------------------------------|-----------------------------------------------------------------|----------------------------------|--------------------------------------------------------------|------------------------|-------------------------------|------------------------------------------|-------|
| A     | 3                         | 1                               | 8                                               | 1                                       | 4                            | 10                                             | 10                                        | 15                                      | 34                             | 0                                                        | 2                        | 16                                                 | 0                                   | 36                           | 9                                        | 4                              | 4                               | 0                                      | 3                                                               | 3                                | 0                                                            | 3                      | 5                             | 1                                        | 172   |
| B     | 2                         | 0                               | 2                                               | 0                                       | 1                            | 1                                              | 0                                         | 2                                       | 2                              | 0                                                        | 2                        | 3                                                  | 0                                   | 4                            | 0                                        | 3                              | 0                               | 0                                      | 2                                                               | 0                                | 0                                                            | 0                      | 0                             | 0                                        | 24    |
| C     | 2                         | 0                               | 2                                               | 0                                       | 0                            | 4                                              | 1                                         | 5                                       | 7                              | 2                                                        | 0                        | 9                                                  | 0                                   | 10                           | 3                                        | 1                              | 0                               | 1                                      | 1                                                               | 1                                | 0                                                            | 1                      | 1                             | 0                                        | 51    |
| D     | 2                         | 0                               | 1                                               | 1                                       | 0                            | 1                                              | 0                                         | 10                                      | 2                              | 0                                                        | 1                        | 10                                                 | 0                                   | 16                           | 0                                        | 1                              | 0                               | 0                                      | 0                                                               | 0                                | 0                                                            | 0                      | 3                             | 0                                        | 48    |
| E     | 0                         | 0                               | 0                                               | 0                                       | 0                            | 0                                              | 1                                         | 0                                       | 1                              | 0                                                        | 0                        | 0                                                  | 0                                   | 2                            | 0                                        | 0                              | 1                               | 0                                      | 0                                                               | 0                                | 0                                                            | 1                      | 0                             | 0                                        | 6     |
| F     | 1                         | 0                               | 0                                               | 0                                       | 1                            | 3                                              | 1                                         | 8                                       | 2                              | 0                                                        | 0                        | 11                                                 | 0                                   | 6                            | 0                                        | 1                              | 0                               | 0                                      | 0                                                               | 0                                | 0                                                            | 0                      | 0                             | 0                                        | 34    |
| G     | 1                         | 0                               | 3                                               | 0                                       | 1                            | 3                                              | 4                                         | 1                                       | 3                              | 1                                                        | 1                        | 2                                                  | 0                                   | 4                            | 6                                        | 2                              | 2                               | 0                                      | 1                                                               | 1                                | 0                                                            | 0                      | 1                             | 0                                        | 37    |
| H     | 2                         | 0                               | 2                                               | 2                                       | 0                            | 1                                              | 0                                         | 3                                       | 3                              | 0                                                        | 1                        | 4                                                  | 1                                   | 2                            | 1                                        | 0                              | 1                               | 1                                      | 1                                                               | 2                                | 1                                                            | 1                      | 0                             | 0                                        | 29    |
| Total | 13                        | 1                               | 18                                              | 4                                       | 7                            | 23                                             | 17                                        | 44                                      | 54                             | 3                                                        | 7                        | 55                                                 | 1                                   | 80                           | 19                                       | 12                             | 8                               | 2                                      | 8                                                               | 7                                | 1                                                            | 6                      | 10                            | 1                                        | 401   |
