# Supplementary material for: Genome-Wide Analysis of the Rab Gene Family in Melilotus albus Reveals Their Role in Salt Tolerance
Source: MDPI journal article supplement (doi:10.3390/ijms24010126), 2022-12-21
Supplement: s1 [file s1]

**Table S3.** Number of *MaRab* genes in each group according to introns amount.

| Group | No. of Introns | No. of Exons |   |   |   |   |   |   | Total |
|-------|----------------|--------------|---|---|---|---|---|---|-------|
|       |                | 1            | 2 | 3 | 4 | 5 | 6 | 7 |       |
| A     |                | 12           | 0 | 0 | 0 | 0 | 0 | 0 | 12    |
| B     |                | 0            | 0 | 0 | 0 | 2 | 0 | 0 | 2     |
| C     |                | 0            | 0 | 0 | 0 | 2 | 0 | 0 | 2     |
| D     |                | 0            | 0 | 0 | 0 | 0 | 0 | 2 | 2     |
| E     |                | 0            | 0 | 0 | 0 | 0 | 0 | 1 | 1     |
| F     |                | 0            | 0 | 0 | 0 | 0 | 1 | 1 | 2     |
| G     |                | 0            | 0 | 0 | 0 | 0 | 4 | 0 | 4     |
| H     |                | 0            | 0 | 0 | 0 | 2 | 0 | 0 | 2     |
| Total |                | 12           | 0 | 0 | 0 | 6 | 5 | 4 | 27    |
