# Supplementary material for: Genome-Wide Analysis of the Rab Gene Family in Melilotus albus Reveals Their Role in Salt Tolerance
Source: MDPI journal article supplement (doi:10.3390/ijms24010126), 2022-12-21
Supplement: s1 [file s1]

**Table S8.** Primers used in this study.

| Primer name | Sequences              |
|-------------|------------------------|
| MaRab1_R    | GCTGGTTCTCAAGATCAC     |
| MaRab1_F    | CCAAGAACGGTATAGAGCA    |
| MaRab5_R    | TTACAAGCAACAACCACC     |
| MaRab5_F    | GTTGATAGAGAATCTGAAAGGG |
| MaRab6_R    | GCTCTGTACCTTTCTTGAC    |
| MaRab6_F    | CGAGGAATCTATTACCGT     |
| MaRab11_R   | CATTAAATCCCTCCTTAGCA   |
| MaRab11_F   | CTTATTCAGGCCAGTCCA     |
| MaRab12_R   | GCTTCCAAAGCAGAAGTC     |
| MaRab12_F   | GTCAGGAAAGGTACCGTG     |
| MaRab13_R   | ACTTCAGCAAATGCATTCTC   |
| MaRab13_F   | GTCAAGAAAGGTATCGCG     |
| MaRab17_R   | CCTCCACATTCTCACCAG     |
| MaRab17_F   | CCAAGAAAGGTACAGGGC     |
| MaRab19_R   | AATTGTTGCCTGATAGGTG    |
| MaRab19_F   | CTTTAGCGAAGTACAAACTG   |
| MaRab22_R   | ATCTCTGTTGTCGTCCAC     |
| MaRab22_F   | TCTCATTCAAGGCTAGTCCA   |

|                |                                                 |
|----------------|-------------------------------------------------|
| MaRab23_R      | TTCCCTCTACCTGAAGG                               |
| MaRab23_F      | TTTGATCGGAGATTCTGG                              |
| MaRab25_R      | GCACGATATCTTTCTTGTC                             |
| MaRab25_F      | GATGACGACTACGATTATCTC                           |
| yeast_MaRab1R  | tacatgatgcggccctctagaTTACTGACAACACATGCTCTTCT    |
| yeast_MaRab1F  | cttggtaccgagctcgatccATGGCGAGTGCAGCAG            |
| yeast_MaRab17R | tacatgatgcggccctctagaTTAACAAGAGCATGAAGACAACCTTC |
| yeast_MaRab17F | cttggtaccgagctcgatccATGGTCCAAGGTGAGAAGAAAC      |

---

\* Primers names include yeast are required for yeast heterologous expression verification, the rest are required for quantitative real-time PCR.
