# Supplementary material for: Genome-Wide Analysis of the Rab Gene Family in Melilotus albus Reveals Their Role in Salt Tolerance
Source: MDPI journal article supplement (doi:10.3390/ijms24010126), 2022-12-21
Supplement: s1 [file s1]

|         |    |   |    |   |   |    |    |    |    |   |   |    |   |    |    |    |   |   |   |   |   |   |    |   |     |
|---------|----|---|----|---|---|----|----|----|----|---|---|----|---|----|----|----|---|---|---|---|---|---|----|---|-----|
| MaRab13 | 0  | 0 | 0  | 0 | 0 | 1  | 1  | 0  | 2  | 0 | 0 | 0  | 0 | 6  | 0  | 0  | 0 | 0 | 1 | 0 | 0 | 0 | 0  | 0 | 11  |
| MaRab14 | 0  | 0 | 1  | 0 | 0 | 0  | 0  | 0  | 1  | 0 | 1 | 1  | 0 | 0  | 0  | 0  | 0 | 0 | 0 | 0 | 0 | 0 | 0  | 0 | 4   |
| MaRab15 | 0  | 0 | 1  | 0 | 0 | 1  | 1  | 0  | 3  | 0 | 1 | 0  | 0 | 4  | 1  | 0  | 0 | 0 | 0 | 0 | 0 | 2 | 0  | 0 | 14  |
| MaRab16 | 0  | 0 | 1  | 1 | 0 | 1  | 0  | 2  | 2  | 0 | 1 | 2  | 0 | 4  | 0  | 1  | 0 | 0 | 0 | 0 | 0 | 0 | 3  | 0 | 18  |
| MaRab17 | 0  | 0 | 0  | 0 | 0 | 0  | 1  | 1  | 5  | 0 | 1 | 0  | 0 | 4  | 0  | 1  | 1 | 0 | 0 | 1 | 0 | 0 | 2  | 0 | 17  |
| MaRab18 | 2  | 0 | 0  | 0 | 0 | 0  | 0  | 8  | 0  | 0 | 0 | 8  | 0 | 12 | 0  | 0  | 0 | 0 | 0 | 0 | 0 | 0 | 0  | 0 | 30  |
| MaRab19 | 1  | 0 | 0  | 1 | 0 | 0  | 0  | 2  | 2  | 0 | 1 | 2  | 1 | 2  | 0  | 0  | 1 | 0 | 0 | 2 | 1 | 1 | 0  | 0 | 17  |
| MaRab20 | 0  | 0 | 3  | 0 | 2 | 3  | 1  | 1  | 3  | 0 | 0 | 1  | 0 | 4  | 4  | 0  | 0 | 0 | 0 | 0 | 0 | 0 | 0  | 0 | 22  |
| MaRab21 | 2  | 0 | 1  | 0 | 1 | 1  | 0  | 2  | 1  | 0 | 1 | 2  | 0 | 4  | 0  | 3  | 0 | 0 | 2 | 0 | 0 | 0 | 0  | 0 | 20  |
| MaRab22 | 0  | 0 | 0  | 0 | 0 | 0  | 2  | 0  | 0  | 1 | 0 | 0  | 0 | 0  | 0  | 1  | 2 | 0 | 0 | 0 | 0 | 0 | 0  | 0 | 6   |
| MaRab23 | 0  | 0 | 0  | 0 | 1 | 0  | 0  | 0  | 0  | 0 | 0 | 1  | 0 | 4  | 1  | 0  | 0 | 0 | 0 | 0 | 0 | 0 | 1  | 0 | 8   |
| MaRab24 | 1  | 0 | 2  | 0 | 0 | 2  | 0  | 0  | 1  | 0 | 1 | 0  | 0 | 0  | 4  | 1  | 0 | 0 | 0 | 0 | 0 | 0 | 0  | 0 | 12  |
| MaRab25 | 0  | 0 | 1  | 1 | 0 | 0  | 3  | 1  | 6  | 0 | 0 | 2  | 0 | 4  | 2  | 0  | 0 | 0 | 0 | 0 | 0 | 0 | 0  | 0 | 20  |
| MaRab26 | 1  | 0 | 2  | 1 | 0 | 1  | 0  | 1  | 1  | 0 | 0 | 2  | 0 | 0  | 1  | 0  | 0 | 1 | 1 | 0 | 0 | 0 | 0  | 0 | 12  |
| MaRab27 | 0  | 0 | 0  | 0 | 0 | 1  | 1  | 0  | 2  | 0 | 0 | 0  | 0 | 2  | 2  | 0  | 0 | 0 | 1 | 1 | 0 | 0 | 0  | 0 | 10  |
| Total   | 13 | 1 | 18 | 4 | 7 | 23 | 17 | 44 | 54 | 3 | 7 | 55 | 1 | 80 | 19 | 12 | 8 | 2 | 8 | 7 | 1 | 6 | 10 | 1 | 401 |

---
