# Supplementary material for: Genome-Wide Analysis of the Rab Gene Family in Melilotus albus Reveals Their Role in Salt Tolerance
Source: MDPI journal article supplement (doi:10.3390/ijms24010126), 2022-12-21
Supplement: s1 [file s1]

**Table S1.** Analysis of amino acid sequence characteristics of *MaRab* gene family in *M. albus*.

| Gene name | Gene ID         | Localization*             | Protein length (aa) | Molecular weight | Theoretical pI | Grand average of hydropathicity (GRAVY) |
|-----------|-----------------|---------------------------|---------------------|------------------|----------------|-----------------------------------------|
| MaRab1    | Malbus0100901.1 | Cytoplasmic               | 223                 | 24605            | 6.84           | -0.242                                  |
| MaRab2    | Malbus0101242.1 | Cytoplasmic               | 223                 | 24909.11         | 5.38           | -0.376                                  |
| MaRab3    | Malbus0102734.1 | Extracellular             | 216                 | 23899.97         | 6.61           | -0.368                                  |
| MaRab4    | Malbus0102808.1 | Cytoplasmic/Chloroplast   | 205                 | 22256.22         | 5.24           | -0.145                                  |
| MaRab5    | Malbus0103131.1 | Extracellular/Chloroplast | 211                 | 23379.67         | 5.46           | -0.246                                  |
| MaRab6    | Malbus0103708.1 | Cytoplasmic/Mitochondrial | 221                 | 24570.04         | 6.17           | -0.201                                  |
| MaRab7    | Malbus0105099.1 | Cytoplasmic/Nuclear       | 211                 | 23729.08         | 6.41           | -0.316                                  |
| MaRab8    | Malbus0203104.1 | Chloroplast               | 200                 | 21884.84         | 6.75           | -0.219                                  |
| MaRab9    | Malbus0203653.1 | Cytoplasmic/Nuclear       | 219                 | 24360.22         | 5.12           | -0.342                                  |
| MaRab10   | Malbus0301562.1 | Cytoplasmic/Chloroplast   | 215                 | 23954.84         | 4.85           | -0.319                                  |
| MaRab11   | Malbus0400281.1 | Cytoplasmic               | 207                 | 23249.31         | 5.4            | -0.379                                  |
| MaRab12   | Malbus0400908.1 | Cytoplasmic/Chloroplast   | 218                 | 24082.11         | 5.72           | -0.234                                  |
| MaRab13   | Malbus0401587.1 | Cytoplasmic               | 217                 | 24005.03         | 5.87           | -0.273                                  |
| MaRab14   | Malbus0403058.1 | Cytoplasmic/Mitochondrial | 210                 | 22961.06         | 6.52           | -0.179                                  |
| MaRab15   | Malbus0404520.1 | Cytoplasmic               | 217                 | 24184.22         | 5.34           | -0.271                                  |
| MaRab16   | Malbus0500112.1 | Cytoplasmic/Golgi         | 203                 | 22477.33         | 5.11           | -0.292                                  |

|         |                 |                           |     |          |      |        |
|---------|-----------------|---------------------------|-----|----------|------|--------|
| MaRab17 | Malbus0501082.1 | Cytoplasmic               | 235 | 25872.39 | 5.17 | -0.206 |
| MaRab18 | Malbus0503821.1 | Golgi                     | 202 | 22430.32 | 5.53 | -0.331 |
| MaRab19 | Malbus0601485.1 | Chloroplast               | 207 | 23034.29 | 7.67 | -0.166 |
| MaRab20 | Malbus0603614.1 | Cytoplasmic               | 216 | 24511.98 | 5.24 | -0.325 |
| MaRab21 | Malbus0604274.1 | Cytoplasmic/Mitochondrial | 211 | 23254.35 | 6.9  | -0.263 |
| MaRab22 | Malbus0700190.1 | Cytoplasmic               | 207 | 23281.36 | 5.61 | -0.386 |
| MaRab23 | Malbus0702319.1 | Cytoplasmic/Mitochondrial | 215 | 23698.69 | 6.22 | -0.279 |
| MaRab24 | Malbus0702537.1 | Cytoplasmic/Chloroplast   | 206 | 23071.9  | 5    | -0.441 |
| MaRab25 | Malbus0703028.1 | Cytoplasmic               | 217 | 24199.27 | 5.63 | -0.249 |
| MaRab26 | Malbus0704571.1 | Cytoplasmic/Chloroplast   | 207 | 23191.46 | 6.39 | -0.248 |
| MaRab27 | Malbus0603614.1 | Cytoplasmic               | 206 | 23236.44 | 6.16 | -0.358 |

---

\* Subcellular localization after the slash is predicted as the second most likely location.
