# Supplementary material for: Genome-Wide Analysis of the Rab Gene Family in Melilotus albus Reveals Their Role in Salt Tolerance
Source: MDPI journal article supplement (doi:10.3390/ijms24010126), 2022-12-21
Supplement: s1 [file s1]

**Table S6.** Divergence between 13 *MaRab* gene pairs in *M. albus*.

| Gene 1                       | Gene 2                       | Duplication | <i>Ka</i> | <i>Ks</i> | <i>Ka/Ks</i> |
|------------------------------|------------------------------|-------------|-----------|-----------|--------------|
| MaRab5<br>(Malbus0103131.1)  | Malbus0304262.1              | W           | 0.091989  | 0.667796  | 0.13774988   |
| MaRab3<br>(Malbus0102734.1)  | Malbus0304003.1              | W           | 0.026853  | 0.652423  | 0.04115906   |
| MaRab1<br>(Malbus0100901.1)  | Malbus0704541.1              | W           | 0.051028  | 0.853293  | 0.0598015    |
| Malbus0100934.1              | MaRab26<br>(Malbus0704571.1) | W           | 0.152714  | 0.873756  | 0.17477927   |
| MaRab8<br>(Malbus0203104.1)  | Malbus0801493.1              | W           | 0.035575  | 0.460449  | 0.07726241   |
| Malbus0304064.1              | MaRab17<br>(Malbus0501082.1) | W           | 0.102754  | 0.828948  | 0.12395656   |
| Malbus0302953.1              | MaRab16<br>(Malbus0500112.1) | W           | 0.032667  | 0.407585  | 0.08014805   |
| MaRab11<br>(Malbus0400281.1) | MaRab22<br>(Malbus0700190.1) | W           | 0.022033  | 0.579968  | 0.03799072   |
| Malbus0401076.1              | MaRab25<br>(Malbus0703028.1) | W           | 0.11122   | 1.092289  | 0.10182268   |
| MaRab15<br>(Malbus0404520.1) | Malbus0703473.1              | W           | 0.031001  | 0.832764  | 0.03722722   |
| Malbus0503785.1              | MaRab19<br>(Malbus0601485.1) | W           | 0.042487  | 0.558984  | 0.07600804   |
| Malbus0500422.1              | MaRab20<br>(Malbus0603614.1) | W           | 0.150804  | 0.817649  | 0.18443666   |
| MaRab25<br>(Malbus0703028.1) | Malbus0703473.1              | W           | 0.062163  | 1.657565  | 0.03750238   |

Notes: W, whole genome-wide duplication; *Ka*, non-synonymous substitution rate; *Ks*, synonymous substitution rate.
