# Supplementary material for: Genome-Wide Analysis of the Rab Gene Family in Melilotus albus Reveals Their Role in Salt Tolerance
Source: MDPI journal article supplement (doi:10.3390/ijms24010126), 2022-12-21
Supplement: s1 [file s1]

**Table S7.** Databases and websites used in this study.

| No. | Soft/Database                | Function                                                          | Source                                                                                                                              | Date of Access   |
|-----|------------------------------|-------------------------------------------------------------------|-------------------------------------------------------------------------------------------------------------------------------------|------------------|
| 1   | NCBI database                | Obtaining gene sequences and coding sequences (CDSs)              | <a href="https://www.ncbi.nlm.nih.gov/">https://www.ncbi.nlm.nih.gov/</a>                                                           | 20 November 2021 |
| 2   | Pfam website                 | Verifying the candidate Rab genes                                 | <a href="http://pfam.xfam.org/search/keyword">http://pfam.xfam.org/search/keyword</a>                                               | 23 November 2021 |
| 3   | MEME                         | Identifying conserved motifs of Rabs                              | <a href="http://meme-suite.org/tools/meme">http://meme-suite.org/tools/meme</a>                                                     | 25 November 2021 |
| 4   | WebLogo                      | Creating Rab sequence logos from the multiple alignment sequences | <a href="http://weblogo.berkeley.edu/logo.cgi">http://weblogo.berkeley.edu/logo.cgi</a>                                             | 15 December 2021 |
| 5   | Swiss-Model website          | Predicting 3D structures of Rab proteins                          | <a href="https://swissmodel.expasy.org/">https://swissmodel.expasy.org/</a>                                                         | 15 January 2022  |
| 6   | GeneStructure Display Server | Establishing and visualizing all gene structures                  | <a href="http://gsds.cbi.pku.edu.cn/">http://gsds.cbi.pku.edu.cn/</a>                                                               | 20 February 2022 |
| 7   | STRING(v 11.5)               | Establishing Protein interaction network                          | <a href="https://cn.string-db.org/">https://cn.string-db.org/</a>                                                                   | 13 June 2022     |
| 8   | CELLO v.2.5 website          | Predicting the subcellular localization                           | <a href="http://cello.life.nctu.edu.tw/">http://cello.life.nctu.edu.tw/</a>                                                         | 14 June 2022     |
| 9   | Protsacle tool               | Predicting the primary structure of Rab proteins                  | <a href="https://web.expasy.org/protscale">https://web.expasy.org/protscale</a>                                                     | 13 December 2021 |
| 10  | PlantCARE website            | Recognizing the cis-acting elements                               | <a href="http://bioinformatics.psb.ugent.be/webtools/plantcare/html">http://bioinformatics.psb.ugent.be/webtools/plantcare/html</a> | 28 December 2021 |
