# Supplementary material for: Genome-Wide Analysis of the Rab Gene Family in Melilotus albus Reveals Their Role in Salt Tolerance
Source: MDPI journal article supplement (doi:10.3390/ijms24010126), 2022-12-21
Supplement: s1 [file s1]

## Supplementary Figures

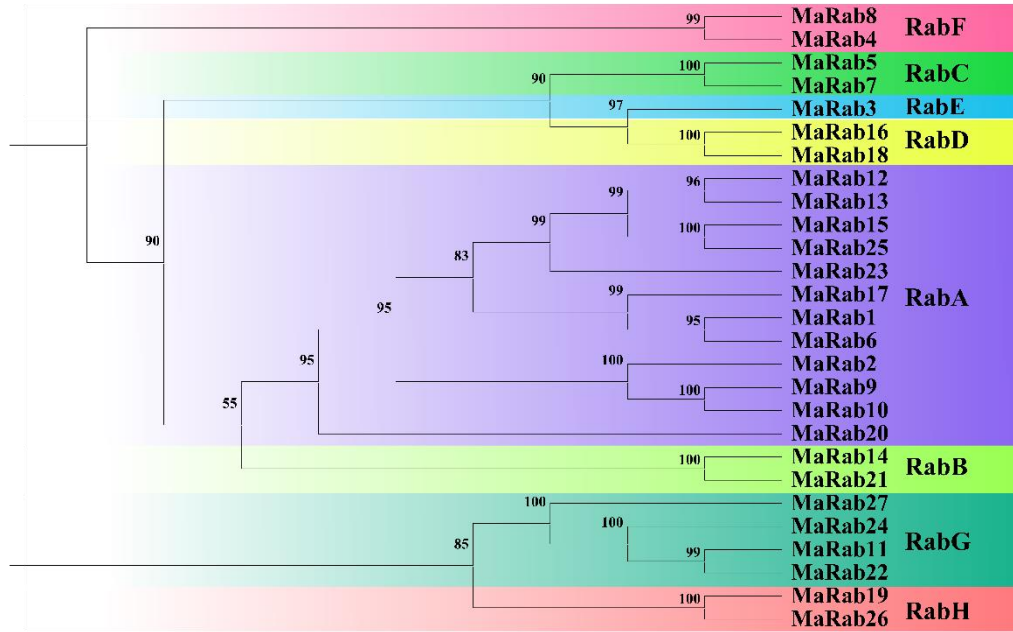

**Figure S1.** Phylogenetic tree of 27 identified *Rabs* from *M. albus* were constructed using the MEGA 7 program [63]. These members were clustered into 8 groups (A–H) and indicated by different colors.

|                                                                                     |                                                                                     |                                                                                     |                                                                                   |                                                                                     |                                                                                     |
|-------------------------------------------------------------------------------------|-------------------------------------------------------------------------------------|-------------------------------------------------------------------------------------|-----------------------------------------------------------------------------------|-------------------------------------------------------------------------------------|-------------------------------------------------------------------------------------|
| 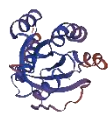   |    |    |  |  |  |
| <b>MaRab1</b>                                                                       | <b>MaRab2</b>                                                                       | <b>MaRab3</b>                                                                       | <b>MaRab4</b>                                                                     | <b>MaRab5</b>                                                                       | <b>MaRab6</b>                                                                       |
|    |    |    |  |  |  |
| <b>MaRab7</b>                                                                       | <b>MaRab8</b>                                                                       | <b>MaRab9</b>                                                                       | <b>MaRab10</b>                                                                    | <b>MaRab11</b>                                                                      | <b>MaRab12</b>                                                                      |
|    |    |    |  |  |  |
| <b>MaRab13</b>                                                                      | <b>MaRab14</b>                                                                      | <b>MaRab15</b>                                                                      | <b>MaRab16</b>                                                                    | <b>MaRab17</b>                                                                      | <b>MaRab18</b>                                                                      |
|    |    |    |  |  |  |
| <b>MaRab19</b>                                                                      | <b>MaRab20</b>                                                                      | <b>MaRab21</b>                                                                      | <b>MaRab22</b>                                                                    | <b>MaRab23</b>                                                                      | <b>MaRab24</b>                                                                      |
|  |  |  |                                                                                   |                                                                                     |                                                                                     |
| <b>MaRab25</b>                                                                      | <b>MaRab26</b>                                                                      | <b>MaRab27</b>                                                                      |                                                                                   |                                                                                     |                                                                                     |

**Figure S2.** Protein 3D structure prediction of *Rab* proteins from *M. ablus*.

Notes: The figure shows the most likely 3D structure of each gene.

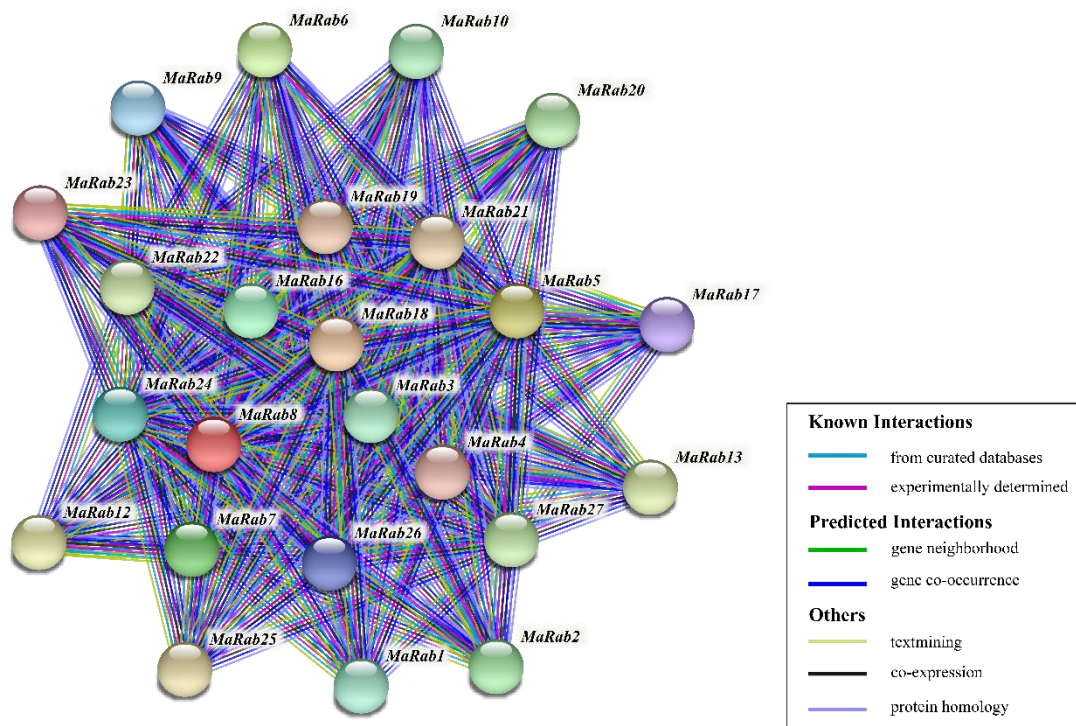

**Figure S3.** Protein network generated by STRING (v 11.5) for *MaRab* genes. Colored nodes represent proteins whereas the different colour of lines represents the types of evidence (depicted by the colour legend) for the association.

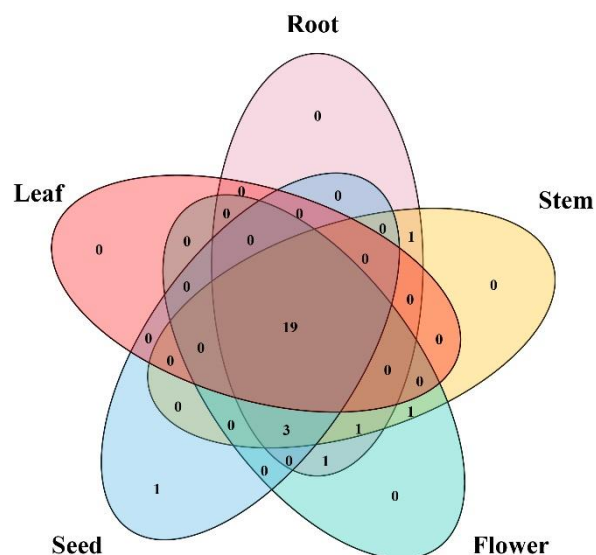

**Figure S4.** Venn diagram showing DEGs in five tissues (leaf, root, stem, flower and seed) of *MaRab* gene family in *M. ablus*.

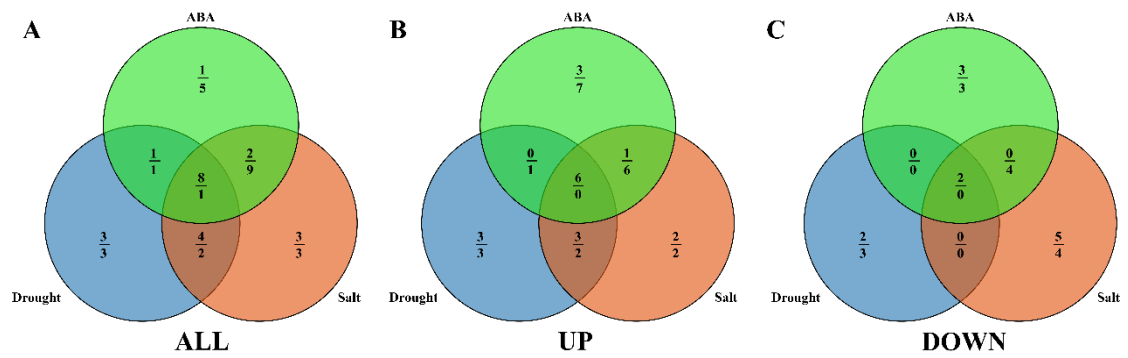

**Figure S5.** DEGs of *MaRab* gene family in *M. ablus* under salt, ABA and drought stress. (A–C) Venn diagram of (A) all, (B) upregulated and (C) downregulated DEGs between different treatment in shoot and root \*.

\* The number above the line represents the number of above-ground DEGs and the number below the line represents the number of root DEGs.
