# Supplementary material for: Genome-Wide Analysis of the Rab Gene Family in Melilotus albus Reveals Their Role in Salt Tolerance
Source: Int J Mol Sci. 2022 Dec 21;24(1):126. doi: 10.3390/ijms24010126 (PMC9820615; doi:10.3390/ijms24010126)
Supplement: Supplementary file 1 [file ijms-24-00126-s001.zip › Table S2.xls]

## Sheet: MatrixOutput
Table S2: Genetic evolutionary distances of Rab genes among M. albus, A. thaliana, M. trun-catula, O. sativa, G. max, C. arietinum and L. corniculatus
	LjRab4	LjRab3	LjRab1	LjRab2	LjRab10	LjRab9	LjRab11	LjRab7	LjRab12	LjRab15	LjRab14	LjRab8	LjRab13	LjRab23	LjRab21	LjRab22	LjRab24	LjRab6	LjRab5	LjRab26	LjRab27	LjRab25	LjRab28	LjRab16	LjRab18	LjRab20	LjRab19	LjRab17	GmRab12	GmRab11	GmRab8	GmRab10	GmRab9	GmRab13	GmRab26	GmRab3	GmRab4	GmRab23	GmRab20	GmRab21	GmRab22	GmRab30	GmRab1	GmRab2	GmRab14	GmRab15	GmRab7	GmRab6	GmRab5
LjRab4
LjRab3	0.532995
LjRab1	0.59204	0.578125
LjRab2	0.569307	0.315271	0.59596
LjRab10	0.625668	0.666667	0.673913	0.668449
LjRab9	0.418367	0.520619	0.536458	0.522843	0.641711
LjRab11	0.554455	0.561224	0.444444	0.597015	0.670213	0.515306
LjRab7	0.557214	0.576531	0.44878	0.615	0.650794	0.540816	0.314286
LjRab12	0.0531401	0.537688	0.588235	0.578431	0.62234	0.424242	0.563107	0.578431
LjRab15	0.610837	0.607143	0.495192	0.631841	0.663158	0.602041	0.447619	0.435407	0.618357
LjRab14	0.579208	0.561224	0.449275	0.577114	0.68254	0.520408	0.188679	0.308057	0.57767	0.464455
LjRab8	0.643617	0.668449	0.67027	0.670213	0.0945274	0.638298	0.677249	0.652632	0.645503	0.680628	0.689474
LjRab13	0.547264	0.579487	0.436893	0.6	0.661376	0.523077	0.246445	0.338095	0.556098	0.428571	0.254717	0.668421
LjRab23	0.577114	0.608247	0.356808	0.61	0.681081	0.549223	0.475962	0.436893	0.585366	0.478469	0.485577	0.677419	0.468599
LjRab21	0.59204	0.60101	0.446602	0.648515	0.650538	0.551546	0.444976	0.415459	0.6	0.397196	0.38756	0.663102	0.403846	0.5
LjRab22	0.607735	0.641618	0.606557	0.634831	0.65896	0.624277	0.579235	0.563536	0.61413	0.606557	0.568306	0.676301	0.579235	0.606557	0.615385
LjRab24	0.0338164	0.540404	0.6	0.571429	0.625668	0.42132	0.567961	0.568627	0.0714286	0.618357	0.587379	0.648936	0.55122	0.585366	0.604878	0.616216
LjRab6	0.57	0.572165	0.495146	0.572864	0.681081	0.533679	0.418269	0.436893	0.573529	0.507109	0.432692	0.693548	0.429952	0.485577	0.514151	0.601093	0.583333
LjRab5	0.639785	0.664865	0.639344	0.655914	0.246231	0.655914	0.663102	0.670213	0.641711	0.661376	0.664894	0.236181	0.638298	0.663043	0.623656	0.647399	0.634409	0.679348
LjRab26	0.525773	0.560209	0.557214	0.564767	0.652406	0.518135	0.541872	0.541872	0.530303	0.585366	0.534314	0.664894	0.536946	0.55665	0.541872	0.630682	0.540404	0.539216	0.652406
LjRab27	0.624339	0.637838	0.609375	0.664894	0.651934	0.589189	0.610256	0.582474	0.626943	0.623711	0.589744	0.664835	0.610256	0.606218	0.622449	0.416667	0.626943	0.6	0.640884	0.638743
LjRab25	0.557789	0.57732	0.460784	0.59596	0.636842	0.520619	0.330144	0.267943	0.561576	0.427885	0.32381	0.649215	0.338095	0.478049	0.407767	0.554945	0.551724	0.458537	0.62963	0.529703	0.592784
LjRab28	0.430769	0.507772	0.554974	0.505102	0.625668	0.238579	0.553846	0.54359	0.436548	0.553846	0.553846	0.62766	0.548718	0.526042	0.564767	0.612717	0.433673	0.536458	0.639785	0.536458	0.6	0.520619
LjRab16	0.410256	0.492228	0.544503	0.510204	0.623656	0.0964467	0.523077	0.528205	0.416244	0.579487	0.528205	0.620321	0.530928	0.526042	0.53886	0.624277	0.413265	0.53125	0.643243	0.510417	0.592391	0.502591	0.204082
LjRab18	0.537313	0.564103	0.432039	0.6	0.656085	0.533333	0.232227	0.333333	0.546341	0.428571	0.240566	0.668421	0.0518868	0.468599	0.403846	0.584699	0.55122	0.415459	0.654255	0.536946	0.615385	0.352381	0.548718	0.525773
LjRab20	0.596059	0.614213	0.447115	0.640394	0.66129	0.525773	0.406699	0.338164	0.599034	0.316279	0.37799	0.668449	0.389423	0.433333	0.317972	0.583784	0.608696	0.490566	0.639785	0.539604	0.625641	0.378641	0.523316	0.518135	0.394231
LjRab19	0.670213	0.690217	0.689474	0.696809	0.625	0.643617	0.690722	0.675258	0.671875	0.678571	0.676923	0.606218	0.692308	0.675393	0.666667	0.597701	0.677083	0.685864	0.643979	0.697917	0.650538	0.65641	0.62234	0.641711	0.707692	0.671875
LjRab17	0.691489	0.686813	0.68254	0.688172	0.623037	0.672043	0.715026	0.678756	0.696335	0.682051	0.706186	0.609375	0.701031	0.668421	0.680628	0.612717	0.696335	0.684211	0.652632	0.685864	0.648649	0.675258	0.645161	0.664865	0.71134	0.670157	0.135
GmRab12	0.641711	0.666667	0.641304	0.657754	0.245	0.657754	0.664894	0.666667	0.643617	0.668421	0.671958	0.24	0.640212	0.664865	0.631016	0.647399	0.636364	0.681081	0.04	0.664894	0.637363	0.631579	0.647059	0.645161	0.656085	0.634409	0.645833	0.65445
GmRab11	0.592179	0.622093	0.6	0.632768	0.639535	0.616279	0.572222	0.550562	0.598901	0.594444	0.561111	0.662791	0.566667	0.6	0.608939	0.08	0.598901	0.594444	0.645349	0.630058	0.372881	0.547486	0.610465	0.610465	0.561111	0.576923	0.569767	0.582353	0.645349
GmRab8	0.545	0.103448	0.573604	0.323671	0.666667	0.55102	0.57	0.58794	0.544554	0.6	0.56	0.668449	0.582915	0.603015	0.61194	0.653409	0.552239	0.570707	0.664865	0.578125	0.636364	0.588832	0.512821	0.512821	0.567839	0.61194	0.68984	0.686486	0.666667	0.64
GmRab10	0.58209	0.597938	0.356808	0.605	0.675676	0.549223	0.475962	0.436893	0.590244	0.483254	0.475962	0.672043	0.468599	0.0779817	0.490385	0.595628	0.590244	0.495192	0.652174	0.566502	0.601036	0.473171	0.541667	0.541667	0.468599	0.42381	0.664921	0.663158	0.654054	0.588889	0.592965
GmRab9	0.597015	0.60804	0.451456	0.648515	0.629032	0.541237	0.440191	0.410628	0.604878	0.393519	0.37799	0.641711	0.389423	0.485577	0.086758	0.615385	0.609756	0.488263	0.602151	0.534314	0.607143	0.407767	0.554404	0.533679	0.384615	0.317972	0.661458	0.675393	0.614973	0.608939	0.613861	0.471154
GmRab13	0.0338164	0.535354	0.6	0.571429	0.620321	0.42132	0.563107	0.563725	0.0809524	0.618357	0.582524	0.643617	0.565854	0.585366	0.609756	0.616216	0.0663507	0.588235	0.634409	0.535354	0.632124	0.551724	0.433673	0.413265	0.556098	0.608696	0.677083	0.691099	0.636364	0.598901	0.547264	0.590244	0.614634
GmRab26	0.410256	0.492228	0.544503	0.510204	0.623656	0.101523	0.523077	0.528205	0.416244	0.579487	0.528205	0.620321	0.530928	0.526042	0.53886	0.624277	0.413265	0.53125	0.643243	0.510417	0.592391	0.502591	0.204082	0.00507614	0.525773	0.518135	0.641711	0.664865	0.645161	0.610465	0.512821	0.541667	0.533679	0.413265
GmRab3	0.619512	0.625	0.485714	0.643902	0.663158	0.586735	0.448113	0.421801	0.62201	0.110638	0.464789	0.680628	0.448113	0.490566	0.410959	0.6	0.626794	0.497653	0.661376	0.580488	0.627551	0.433333	0.548718	0.574359	0.438679	0.331818	0.673469	0.682051	0.668421	0.587912	0.622549	0.490566	0.402715	0.626794	0.574359
GmRab4	0.592965	0.572165	0.497561	0.592965	0.681081	0.541667	0.425121	0.458537	0.596059	0.504762	0.444444	0.688172	0.429952	0.485577	0.523585	0.617486	0.596059	0.116822	0.668478	0.566502	0.620513	0.458537	0.541667	0.534031	0.429952	0.509434	0.675393	0.668421	0.67027	0.605556	0.59596	0.495192	0.497653	0.605911	0.534031	0.502347
GmRab23	0.525773	0.560209	0.557214	0.564767	0.652406	0.518135	0.541872	0.541872	0.530303	0.585366	0.534314	0.664894	0.536946	0.55665	0.541872	0.630682	0.540404	0.539216	0.652406	0	0.638743	0.529703	0.536458	0.510417	0.536946	0.539604	0.697917	0.685864	0.664894	0.630058	0.578125	0.566502	0.534314	0.535354	0.510417	0.580488	0.566502
GmRab20	0.576355	0.295567	0.60804	0.0526316	0.668449	0.507614	0.59204	0.61	0.585366	0.638614	0.562189	0.670213	0.59	0.606965	0.643564	0.631285	0.578431	0.572864	0.655914	0.569948	0.670213	0.60101	0.5	0.494898	0.59	0.647059	0.68617	0.688172	0.657754	0.629213	0.304348	0.606965	0.643564	0.578431	0.494898	0.645631	0.58794	0.569948
GmRab21	0.542289	0.569231	0.432039	0.6	0.650794	0.528205	0.236967	0.328571	0.55122	0.433333	0.25	0.668421	0.0518868	0.468599	0.403846	0.579235	0.556098	0.42029	0.648936	0.53202	0.615385	0.342857	0.548718	0.525773	0.0283019	0.384615	0.702564	0.71134	0.650794	0.561111	0.572864	0.468599	0.389423	0.560976	0.525773	0.443396	0.434783	0.53202	0.59
GmRab22	0.554455	0.566327	0.429952	0.597015	0.675532	0.510204	0.0424528	0.295238	0.563107	0.461905	0.165094	0.677249	0.236967	0.466346	0.425837	0.584699	0.567961	0.408654	0.663102	0.527094	0.605128	0.320574	0.553846	0.512821	0.227488	0.392344	0.695876	0.720207	0.664894	0.577778	0.57	0.466346	0.421053	0.563107	0.512821	0.457547	0.415459	0.527094	0.59204	0.222749
GmRab30	0.536082	0.565445	0.557214	0.544041	0.647059	0.528497	0.546798	0.541872	0.540404	0.590244	0.544118	0.659574	0.561576	0.576355	0.571429	0.636364	0.545455	0.534314	0.647059	0.135266	0.633508	0.544554	0.552083	0.520833	0.55665	0.549505	0.703125	0.696335	0.654255	0.635838	0.557292	0.581281	0.568627	0.545455	0.520833	0.585366	0.566502	0.135266	0.549223	0.55665	0.541872
GmRab1	0.691489	0.686813	0.687831	0.682796	0.623037	0.666667	0.699482	0.694301	0.696335	0.692308	0.690722	0.609375	0.701031	0.684211	0.685864	0.618497	0.696335	0.684211	0.647368	0.696335	0.654054	0.670103	0.645161	0.664865	0.706186	0.680628	0.125	0.0348259	0.649215	0.588235	0.686486	0.678947	0.670157	0.691099	0.664865	0.692308	0.668421	0.696335	0.682796	0.701031	0.704663	0.706806
GmRab2	0.670213	0.690217	0.689474	0.696809	0.625	0.643617	0.690722	0.675258	0.671875	0.678571	0.676923	0.606218	0.692308	0.675393	0.666667	0.597701	0.677083	0.685864	0.643979	0.697917	0.650538	0.65641	0.62234	0.641711	0.707692	0.671875	0	0.135	0.645833	0.569767	0.68984	0.664921	0.661458	0.677083	0.641711	0.673469	0.675393	0.697917	0.68617	0.702564	0.695876	0.703125	0.125
GmRab14	0.552239	0.566327	0.44878	0.61	0.656085	0.540816	0.328571	0.0473934	0.568627	0.425837	0.298578	0.657895	0.338095	0.436893	0.396135	0.569061	0.558824	0.441748	0.675532	0.541872	0.582474	0.277512	0.54359	0.523077	0.333333	0.328502	0.675258	0.678756	0.671958	0.55618	0.572864	0.436893	0.396135	0.558824	0.523077	0.421801	0.463415	0.541872	0.6	0.328571	0.309524	0.53202	0.694301	0.675258
GmRab15	0.589109	0.602041	0.444444	0.638614	0.654054	0.53886	0.413462	0.359223	0.597087	0.336449	0.384615	0.66129	0.405797	0.447619	0.314815	0.578378	0.601942	0.5	0.627027	0.559406	0.613402	0.395122	0.520833	0.53125	0.410628	0.0958904	0.670157	0.678947	0.632432	0.571429	0.6	0.438095	0.310185	0.601942	0.53125	0.351598	0.504717	0.559406	0.640394	0.400966	0.399038	0.564356	0.689474	0.670157	0.349515
GmRab7	0.570707	0.585106	0.192308	0.587629	0.67033	0.513228	0.448276	0.447761	0.57	0.468293	0.448276	0.672131	0.450495	0.326923	0.460396	0.605556	0.567164	0.477833	0.646409	0.537688	0.601064	0.445	0.526596	0.5	0.450495	0.421569	0.68984	0.691489	0.648352	0.59887	0.57513	0.331731	0.440594	0.572139	0.5	0.470874	0.480198	0.537688	0.594872	0.445545	0.438424	0.552764	0.691489	0.68984	0.447761	0.426471
GmRab6	0.643617	0.668449	0.67027	0.670213	0.0945274	0.638298	0.677249	0.652632	0.645503	0.680628	0.689474	0	0.668421	0.677419	0.663102	0.676301	0.648936	0.693548	0.236181	0.664894	0.664835	0.649215	0.62766	0.620321	0.668421	0.668449	0.606218	0.609375	0.24	0.662791	0.668449	0.672043	0.641711	0.643617	0.620321	0.680628	0.688172	0.664894	0.670213	0.668421	0.677249	0.659574	0.609375	0.606218	0.657895	0.66129	0.672131
GmRab5	0.670213	0.690217	0.689474	0.696809	0.625	0.643617	0.690722	0.675258	0.666667	0.678571	0.676923	0.606218	0.692308	0.675393	0.666667	0.597701	0.677083	0.685864	0.643979	0.692708	0.650538	0.651282	0.62234	0.641711	0.707692	0.671875	0.00990099	0.135	0.645833	0.569767	0.68984	0.664921	0.661458	0.677083	0.641711	0.673469	0.675393	0.692708	0.68617	0.702564	0.695876	0.697917	0.135	0.00990099	0.675258	0.670157	0.68984	0.606218
GmRab18	0.569307	0.561224	0.434783	0.577114	0.677249	0.520408	0.198113	0.308057	0.572816	0.464455	0.0751174	0.684211	0.278302	0.471154	0.397129	0.568306	0.582524	0.432692	0.664894	0.52451	0.605128	0.32381	0.548718	0.517949	0.273585	0.392344	0.692308	0.721649	0.666667	0.561111	0.56	0.471154	0.397129	0.57767	0.517949	0.474178	0.449275	0.52451	0.577114	0.273585	0.174528	0.534314	0.706186	0.692308	0.312796	0.394231	0.433498	0.684211	0.692308
GmRab19	0.554455	0.566327	0.429952	0.597015	0.670213	0.510204	0.0330189	0.3	0.563107	0.452381	0.160377	0.677249	0.227488	0.466346	0.421053	0.584699	0.567961	0.408654	0.663102	0.53202	0.6	0.315789	0.553846	0.517949	0.218009	0.392344	0.695876	0.720207	0.664894	0.577778	0.57	0.466346	0.416268	0.563107	0.517949	0.45283	0.415459	0.53202	0.59204	0.222749	0.0141509	0.546798	0.704663	0.695876	0.314286	0.399038	0.438424	0.677249	0.695876
GmRab17	0.537313	0.574359	0.432039	0.6	0.656085	0.517949	0.255924	0.338095	0.546341	0.433333	0.264151	0.663158	0.0141509	0.458937	0.408654	0.584699	0.541463	0.429952	0.638298	0.536946	0.610256	0.342857	0.548718	0.520619	0.0471698	0.394231	0.692308	0.695876	0.640212	0.566667	0.577889	0.458937	0.394231	0.556098	0.520619	0.45283	0.429952	0.536946	0.59	0.0518868	0.246445	0.561576	0.701031	0.692308	0.338095	0.410628	0.445545	0.663158	0.692308
GmRab16	0.625668	0.666667	0.679348	0.668449	0.00995025	0.641711	0.670213	0.650794	0.62234	0.668421	0.68254	0.0945274	0.661376	0.681081	0.650538	0.65896	0.625668	0.681081	0.241206	0.647059	0.657459	0.636842	0.625668	0.623656	0.656085	0.66129	0.625	0.623037	0.245	0.639535	0.666667	0.675676	0.629032	0.620321	0.623656	0.668421	0.681081	0.647059	0.668449	0.650794	0.675532	0.641711	0.623037	0.625	0.656085	0.654054	0.675824	0.0945274	0.625
GmRab28	0.394872	0.481865	0.539267	0.505102	0.629032	0.0456853	0.517949	0.533333	0.401015	0.589744	0.523077	0.625668	0.525773	0.546875	0.53886	0.624277	0.397959	0.53125	0.648649	0.5	0.586957	0.510309	0.214286	0.0714286	0.520619	0.528497	0.636364	0.659459	0.650538	0.610465	0.512821	0.552083	0.53886	0.397959	0.0765306	0.579487	0.534031	0.5	0.489796	0.520619	0.507692	0.510417	0.659459	0.636364	0.528205	0.541667	0.510638	0.625668	0.636364
GmRab27	0.619048	0.627027	0.604167	0.664894	0.646409	0.589189	0.6	0.592784	0.61658	0.613402	0.584615	0.67033	0.605128	0.601036	0.612245	0.405556	0.61658	0.594872	0.635359	0.628272	0.0306122	0.587629	0.6	0.581522	0.6	0.615385	0.645161	0.648649	0.631868	0.361582	0.625668	0.595855	0.596939	0.621762	0.581522	0.612245	0.615385	0.628272	0.664894	0.6	0.6	0.623037	0.654054	0.645161	0.592784	0.608247	0.590426	0.67033	0.645161
GmRab29	0.60199	0.598958	0.0700935	0.616162	0.663043	0.541667	0.449275	0.439024	0.598039	0.509615	0.454106	0.67027	0.446602	0.352113	0.456311	0.606557	0.609756	0.504854	0.644809	0.567164	0.614583	0.470588	0.554974	0.560209	0.451456	0.442308	0.684211	0.687831	0.63587	0.6	0.593909	0.352113	0.461165	0.604878	0.560209	0.5	0.502439	0.567164	0.623116	0.451456	0.429952	0.567164	0.693122	0.684211	0.439024	0.454106	0.192308	0.67027	0.684211
GmRab25	0.552764	0.561856	0.455882	0.590909	0.62766	0.525773	0.315789	0.253589	0.55665	0.427885	0.319048	0.640212	0.328571	0.473171	0.393204	0.56044	0.561576	0.44878	0.636364	0.514851	0.592784	0.119048	0.525773	0.518135	0.338095	0.359223	0.659794	0.663212	0.638298	0.553073	0.57868	0.463415	0.398058	0.561576	0.518135	0.438095	0.468293	0.514851	0.59596	0.328571	0.311005	0.524752	0.663212	0.659794	0.248804	0.380488	0.46	0.640212	0.654639
GmRab24	0.451282	0.523316	0.554974	0.515306	0.625668	0.243655	0.558974	0.533333	0.456853	0.569231	0.558974	0.62766	0.553846	0.536458	0.559585	0.618497	0.454082	0.541667	0.639785	0.552083	0.610811	0.520619	0.0456853	0.219388	0.553846	0.523316	0.617021	0.639785	0.647059	0.622093	0.528205	0.541667	0.549223	0.454082	0.214286	0.564103	0.541667	0.552083	0.510204	0.553846	0.558974	0.5625	0.639785	0.617021	0.533333	0.536458	0.542553	0.62766	0.617021
CaRab17	0.636364	0.672043	0.684783	0.668449	0.0298507	0.647059	0.664894	0.650794	0.632979	0.678947	0.677249	0.109453	0.656085	0.681081	0.655914	0.653179	0.636364	0.675676	0.246231	0.641711	0.651934	0.626316	0.620321	0.623656	0.650794	0.666667	0.625	0.628272	0.25	0.651163	0.672043	0.681081	0.634409	0.631016	0.623656	0.678947	0.681081	0.641711	0.668449	0.645503	0.670213	0.636364	0.628272	0.625	0.656085	0.659459	0.681319	0.109453	0.625
CaRab21	0.552239	0.571429	0.44878	0.615	0.650794	0.540816	0.314286	0.0236967	0.573529	0.440191	0.303318	0.652632	0.342857	0.441748	0.405797	0.563536	0.563725	0.436893	0.670213	0.541872	0.582474	0.277512	0.54359	0.528205	0.338095	0.338164	0.675258	0.683938	0.666667	0.550562	0.582915	0.436893	0.405797	0.558824	0.528205	0.42654	0.458537	0.541872	0.61	0.333333	0.295238	0.541872	0.699482	0.675258	0.0379147	0.359223	0.447761	0.652632	0.675258
CaRab16	0.624339	0.643243	0.598958	0.680851	0.646409	0.583784	0.610256	0.597938	0.621762	0.613402	0.594872	0.67033	0.615385	0.606218	0.617347	0.416667	0.621762	0.605128	0.640884	0.633508	0.0357143	0.592784	0.605405	0.581522	0.610256	0.620513	0.650538	0.654054	0.637363	0.372881	0.641711	0.601036	0.602041	0.626943	0.581522	0.617347	0.620513	0.633508	0.680851	0.610256	0.605128	0.628272	0.659459	0.650538	0.597938	0.618557	0.585106	0.67033	0.650538
CaRab11	0.664894	0.690217	0.694737	0.696809	0.625	0.648936	0.690722	0.675258	0.666667	0.678571	0.676923	0.606218	0.692308	0.680628	0.666667	0.597701	0.671875	0.685864	0.643979	0.697917	0.650538	0.661538	0.62766	0.647059	0.707692	0.671875	0.00990099	0.14	0.645833	0.569767	0.68984	0.670157	0.661458	0.671875	0.647059	0.673469	0.675393	0.697917	0.68617	0.702564	0.695876	0.697917	0.13	0.00990099	0.675258	0.670157	0.695187	0.606218	0.019802
CaRab13	0.532338	0.574359	0.446602	0.6	0.661376	0.523077	0.260664	0.352381	0.541463	0.433333	0.273585	0.668421	0.0283019	0.458937	0.413462	0.590164	0.536585	0.434783	0.648936	0.536946	0.615385	0.357143	0.553846	0.525773	0.0613208	0.403846	0.697436	0.701031	0.650794	0.572222	0.577889	0.468599	0.399038	0.55122	0.525773	0.457547	0.434783	0.536946	0.59	0.0660377	0.251185	0.561576	0.706186	0.697436	0.352381	0.42029	0.445545	0.668421	0.697436
CaRab12	0.577889	0.29064	0.6	0.145631	0.672043	0.515464	0.585859	0.604061	0.58209	0.621212	0.565657	0.673797	0.588832	0.598985	0.64	0.622857	0.58	0.561224	0.659459	0.583333	0.645161	0.594872	0.492228	0.502591	0.588832	0.63	0.67027	0.672131	0.66129	0.614943	0.294118	0.598985	0.635	0.58	0.502591	0.633663	0.581633	0.583333	0.131068	0.588832	0.590909	0.567708	0.666667	0.67027	0.598985	0.623116	0.591623	0.673797	0.67027
CaRab27	0.608911	0.595855	0.0794393	0.613065	0.664865	0.549223	0.4375	0.451456	0.604878	0.507177	0.442308	0.672043	0.429952	0.361502	0.439614	0.61413	0.616505	0.502415	0.63587	0.564356	0.632124	0.463415	0.567708	0.546875	0.425121	0.435407	0.696335	0.7	0.637838	0.607735	0.585859	0.366197	0.449275	0.61165	0.546875	0.49763	0.495146	0.564356	0.62	0.425121	0.423077	0.564356	0.7	0.696335	0.451456	0.442308	0.1875	0.672043	0.696335
CaRab23	0.589109	0.598985	0.483092	0.613861	0.668421	0.581633	0.473684	0.461538	0.597087	0.174107	0.480952	0.680628	0.444976	0.497608	0.400943	0.60989	0.606796	0.502415	0.666667	0.560976	0.618557	0.454106	0.548718	0.564103	0.435407	0.361502	0.673469	0.682051	0.668421	0.608939	0.597015	0.502392	0.397196	0.597087	0.564103	0.219298	0.507246	0.560976	0.62069	0.440191	0.483254	0.565854	0.692308	0.673469	0.451923	0.367925	0.472906	0.680628	0.673469
CaRab10	0.611702	0.644444	0.617801	0.663043	0.668539	0.625698	0.589474	0.579787	0.617801	0.625	0.573684	0.679775	0.594737	0.615789	0.636842	0.103448	0.614583	0.621053	0.668539	0.639344	0.441489	0.566138	0.620112	0.620112	0.589474	0.590674	0.594444	0.614525	0.662921	0.065	0.661202	0.605263	0.628272	0.619792	0.620112	0.613402	0.631579	0.639344	0.659459	0.584211	0.594737	0.650273	0.620112	0.594444	0.585106	0.583333	0.614973	0.679775	0.594444
CaRab8	0.0637255	0.548223	0.59901	0.58	0.631016	0.42132	0.558824	0.561576	0.0917874	0.617647	0.583333	0.654255	0.551724	0.584158	0.605911	0.60989	0.0432692	0.589109	0.639785	0.545455	0.621762	0.549505	0.438776	0.418367	0.551724	0.607843	0.682292	0.701571	0.641711	0.592179	0.557789	0.584158	0.600985	0.0817308	0.418367	0.616505	0.60199	0.545455	0.58209	0.55665	0.558824	0.550505	0.701571	0.682292	0.561576	0.596059	0.560606	0.654255	0.682292
CaRab18	0.59204	0.611111	0.441748	0.653465	0.639785	0.556701	0.430622	0.400966	0.604878	0.38785	0.373206	0.652406	0.379808	0.480769	0.0639269	0.604396	0.604878	0.504717	0.607527	0.53202	0.622449	0.38835	0.564767	0.544041	0.389423	0.308756	0.666667	0.680628	0.620321	0.603352	0.616915	0.471154	0.0684932	0.609756	0.544041	0.39726	0.509434	0.53202	0.648515	0.379808	0.406699	0.566502	0.685864	0.666667	0.381643	0.305556	0.445545	0.652406	0.666667
CaRab4	0.574257	0.6	0.352113	0.605	0.672043	0.544041	0.471154	0.427184	0.580488	0.47619	0.461538	0.668449	0.468599	0.101382	0.485577	0.604396	0.580488	0.497585	0.648649	0.569307	0.601036	0.468293	0.536458	0.536458	0.468599	0.419048	0.659686	0.664921	0.655914	0.597765	0.595	0.0599078	0.4689	0.580488	0.536458	0.483568	0.492754	0.569307	0.606965	0.468599	0.461538	0.584158	0.675393	0.659686	0.427184	0.430622	0.326923	0.668449	0.659686
CaRab5	0.645161	0.67027	0.639344	0.66129	0.256281	0.66129	0.657754	0.664894	0.647059	0.671958	0.670213	0.246231	0.643617	0.657609	0.629032	0.647399	0.639785	0.684783	0.05	0.663102	0.651934	0.62963	0.650538	0.648649	0.659574	0.634409	0.649215	0.657895	0.05	0.645349	0.664865	0.646739	0.607527	0.639785	0.648649	0.666667	0.673913	0.663102	0.66129	0.654255	0.657754	0.657754	0.652632	0.649215	0.670213	0.632432	0.646409	0.246231	0.649215
CaRab24	0.0434783	0.535354	0.595122	0.571429	0.620321	0.426396	0.558252	0.558824	0.0761905	0.618357	0.57767	0.643617	0.556098	0.580488	0.604878	0.616216	0.0758294	0.578431	0.639785	0.535354	0.626943	0.55665	0.438776	0.418367	0.546341	0.608696	0.677083	0.691099	0.641711	0.598901	0.542289	0.585366	0.609756	0.0236967	0.418367	0.626794	0.596059	0.535354	0.578431	0.55122	0.558252	0.550505	0.696335	0.677083	0.553922	0.601942	0.572139	0.643617	0.677083
CaRab26	0.547264	0.112745	0.586735	0.318841	0.673797	0.558376	0.585	0.603015	0.551724	0.64186	0.58	0.675532	0.58794	0.60101	0.628713	0.655367	0.544554	0.580808	0.66129	0.567708	0.641711	0.588832	0.510204	0.52551	0.582915	0.626866	0.673797	0.675676	0.663102	0.642045	0.0772947	0.59596	0.632353	0.549505	0.52551	0.6621	0.585859	0.567708	0.299517	0.58794	0.585	0.557292	0.675676	0.673797	0.592965	0.615	0.578125	0.675532	0.673797
CaRab2	0.537313	0.564103	0.436893	0.6	0.656085	0.528205	0.232227	0.333333	0.546341	0.42381	0.240566	0.663158	0.0518868	0.47343	0.403846	0.584699	0.55122	0.42029	0.648936	0.53202	0.610256	0.342857	0.54359	0.520619	0.0188679	0.389423	0.702564	0.706186	0.650794	0.561111	0.567839	0.47343	0.379808	0.546341	0.520619	0.429245	0.434783	0.53202	0.59	0.0283019	0.222749	0.55665	0.701031	0.702564	0.333333	0.405797	0.450495	0.663158	0.702564
CaRab15	0.554455	0.566327	0.434783	0.597015	0.670213	0.515306	0.0283019	0.3	0.563107	0.447619	0.165094	0.677249	0.232227	0.461538	0.425837	0.584699	0.567961	0.408654	0.663102	0.536946	0.6	0.325359	0.553846	0.523077	0.218009	0.397129	0.695876	0.720207	0.664894	0.577778	0.57	0.461538	0.421053	0.563107	0.523077	0.448113	0.415459	0.536946	0.59204	0.227488	0.0283019	0.546798	0.704663	0.695876	0.314286	0.403846	0.438424	0.677249	0.695876
CaRab9	0.525773	0.554974	0.562189	0.559585	0.652406	0.518135	0.541872	0.541872	0.530303	0.585366	0.534314	0.664894	0.536946	0.561576	0.541872	0.630682	0.540404	0.539216	0.652406	0.0144928	0.638743	0.529703	0.536458	0.510417	0.536946	0.539604	0.697917	0.685864	0.664894	0.630058	0.572917	0.571429	0.539216	0.535354	0.510417	0.580488	0.566502	0.0144928	0.564767	0.53202	0.527094	0.144928	0.696335	0.697917	0.541872	0.559406	0.542714	0.664894	0.692708
CaRab1	0.572139	0.556122	0.439024	0.605	0.647368	0.512821	0.333333	0.261905	0.57561	0.439252	0.327014	0.664921	0.347619	0.466019	0.403756	0.554945	0.580488	0.438095	0.656085	0.517241	0.597938	0.132075	0.520619	0.505155	0.352381	0.375587	0.682051	0.685567	0.657895	0.553073	0.577889	0.461165	0.408451	0.580488	0.505155	0.451613	0.45933	0.517241	0.6	0.342857	0.32381	0.522167	0.680412	0.682051	0.257143	0.400943	0.452736	0.664921	0.676923
CaRab3	0.643617	0.663102	0.659459	0.659574	0.114428	0.638298	0.666667	0.657895	0.645503	0.680628	0.678947	0.0445545	0.657895	0.677419	0.663102	0.66474	0.648936	0.688172	0.241206	0.664894	0.664835	0.643979	0.62766	0.625668	0.657895	0.668449	0.621762	0.619792	0.245	0.656977	0.663102	0.672043	0.641711	0.643617	0.625668	0.680628	0.682796	0.664894	0.664894	0.657895	0.666667	0.659574	0.619792	0.621762	0.663158	0.66129	0.661202	0.0445545	0.621762
CaRab7	0.574257	0.561224	0.434783	0.562189	0.677249	0.52551	0.183962	0.308057	0.57767	0.469194	0.0704225	0.684211	0.273585	0.451923	0.397129	0.579235	0.587379	0.432692	0.670213	0.519608	0.6	0.32381	0.548718	0.528205	0.259434	0.38756	0.682051	0.71134	0.666667	0.572222	0.56	0.456731	0.401914	0.57767	0.528205	0.469484	0.449275	0.519608	0.562189	0.259434	0.160377	0.52451	0.695876	0.682051	0.308057	0.403846	0.428571	0.684211	0.682051
CaRab6	0.394872	0.487047	0.539267	0.515306	0.634409	0.0609137	0.533333	0.54359	0.401015	0.584615	0.523077	0.631016	0.525773	0.541667	0.533679	0.630058	0.397959	0.53125	0.654054	0.515625	0.592391	0.520619	0.209184	0.0765306	0.520619	0.528497	0.636364	0.659459	0.655914	0.616279	0.517949	0.541667	0.523316	0.397959	0.0816327	0.574359	0.534031	0.515625	0.5	0.520619	0.523077	0.520833	0.659459	0.636364	0.538462	0.541667	0.515957	0.631016	0.641711
CaRab22	0.582915	0.582011	0.194313	0.589744	0.666667	0.531579	0.460784	0.445545	0.58209	0.475728	0.45098	0.668478	0.44335	0.333333	0.448276	0.605556	0.579208	0.487685	0.637363	0.542714	0.608466	0.447761	0.529101	0.513228	0.44335	0.414634	0.691489	0.687831	0.639344	0.59887	0.572165	0.328571	0.428571	0.584158	0.513228	0.478261	0.490099	0.542714	0.596939	0.433498	0.45098	0.557789	0.693122	0.691489	0.445545	0.421569	0.0480769	0.668478	0.691489
CaRab19	0.62963	0.632432	0.614583	0.675532	0.651934	0.594595	0.6	0.587629	0.626943	0.618557	0.584615	0.67033	0.615385	0.61658	0.617347	0.422222	0.626943	0.6	0.640884	0.643979	0.0561224	0.582474	0.605405	0.586957	0.605128	0.615385	0.634409	0.648649	0.637363	0.378531	0.636364	0.611399	0.596939	0.632124	0.586957	0.617347	0.620513	0.643979	0.675532	0.605128	0.6	0.633508	0.648649	0.634409	0.587629	0.608247	0.595745	0.67033	0.634409
CaRab25	0.639785	0.664865	0.63388	0.655914	0.256281	0.650538	0.663102	0.664894	0.641711	0.661376	0.659574	0.246231	0.62234	0.663043	0.61828	0.641618	0.634409	0.679348	0.035	0.657754	0.640884	0.624339	0.639785	0.637838	0.638298	0.634409	0.643979	0.652632	0.05	0.639535	0.659459	0.652174	0.596774	0.634409	0.637838	0.661376	0.668478	0.657754	0.655914	0.632979	0.663102	0.652406	0.647368	0.643979	0.670213	0.621622	0.640884	0.246231	0.643979
CaRab20	0.530928	0.554974	0.552239	0.544041	0.647059	0.512953	0.546798	0.541872	0.535354	0.595122	0.539216	0.659574	0.561576	0.581281	0.55665	0.625	0.540404	0.529412	0.641711	0.111111	0.623037	0.529703	0.552083	0.505208	0.55665	0.554455	0.697917	0.680628	0.643617	0.624277	0.557292	0.581281	0.563725	0.535354	0.505208	0.590244	0.561576	0.111111	0.549223	0.55665	0.536946	0.0676329	0.691099	0.697917	0.541872	0.569307	0.552764	0.659574	0.692708
CaRab14	0.594059	0.607143	0.449275	0.648515	0.648649	0.53886	0.413462	0.354369	0.597087	0.336449	0.389423	0.655914	0.415459	0.447619	0.305556	0.578378	0.606796	0.5	0.632432	0.554455	0.613402	0.4	0.526042	0.536458	0.42029	0.086758	0.675393	0.684211	0.627027	0.571429	0.61	0.438095	0.305556	0.606796	0.536458	0.342466	0.514151	0.554455	0.650246	0.410628	0.399038	0.559406	0.694737	0.675393	0.34466	0.0593607	0.436275	0.655914	0.675393
AtRabA5d	0.58209	0.578125	0.169811	0.60101	0.67027	0.559585	0.47343	0.453659	0.588235	0.497608	0.458937	0.677419	0.446602	0.363208	0.456311	0.620879	0.590244	0.5	0.663043	0.569307	0.645833	0.460784	0.572917	0.552083	0.436893	0.475962	0.685864	0.673684	0.664865	0.608939	0.573604	0.363208	0.461165	0.595122	0.552083	0.490476	0.487805	0.569307	0.60804	0.441748	0.454106	0.579208	0.678947	0.685864	0.44878	0.47343	0.201923	0.677419	0.685864
AtRabH1b	0.671958	0.690217	0.685864	0.68617	0.619792	0.659574	0.702564	0.692308	0.673575	0.700508	0.693878	0.595855	0.69898	0.666667	0.678756	0.611429	0.673575	0.6875	0.643979	0.709845	0.647059	0.668367	0.62766	0.652406	0.69898	0.694301	0.108911	0.0746269	0.645833	0.581395	0.68984	0.666667	0.668394	0.678756	0.652406	0.700508	0.671875	0.709845	0.68617	0.69898	0.707692	0.720207	0.0746269	0.108911	0.692308	0.692708	0.68617	0.595855	0.118812
AtRabA1h	0.559406	0.581633	0.449275	0.60199	0.661376	0.535714	0.29717	0.35545	0.567961	0.464455	0.300469	0.663158	0.122642	0.485577	0.425837	0.590164	0.572816	0.456731	0.648936	0.52451	0.605128	0.366667	0.553846	0.533333	0.122642	0.401914	0.697436	0.701031	0.650794	0.572222	0.585	0.485577	0.421053	0.572816	0.533333	0.474178	0.468599	0.52451	0.59204	0.117925	0.278302	0.54902	0.701031	0.697436	0.36019	0.418269	0.458128	0.663158	0.697436
AtRabA5c	0.582915	0.584211	0.177033	0.591837	0.672131	0.544503	0.468293	0.458128	0.589109	0.512077	0.44878	0.679348	0.441176	0.358852	0.441176	0.615385	0.591133	0.502439	0.653846	0.552239	0.621053	0.455446	0.563158	0.542105	0.436275	0.456311	0.677249	0.670213	0.655738	0.614525	0.579487	0.349282	0.436275	0.596059	0.542105	0.5	0.495098	0.552239	0.604061	0.436275	0.44878	0.562189	0.680851	0.677249	0.458128	0.461165	0.207729	0.679348	0.677249
AtRabG2	0.65625	0.677249	0.640212	0.671875	0.338308	0.657895	0.663212	0.685567	0.658031	0.673469	0.659794	0.346535	0.654639	0.7	0.630208	0.643678	0.651042	0.691099	0.255	0.661458	0.664865	0.635897	0.652632	0.650794	0.670103	0.640625	0.654822	0.678571	0.253731	0.65896	0.675393	0.694737	0.625	0.661458	0.650794	0.673469	0.685864	0.661458	0.677083	0.664948	0.658031	0.661458	0.673469	0.654822	0.690722	0.628272	0.663102	0.346535	0.654822
AtRabH1d	0.670213	0.684783	0.705263	0.691489	0.645833	0.654255	0.690722	0.680412	0.666667	0.693878	0.682051	0.626943	0.692308	0.696335	0.677083	0.609195	0.677083	0.691099	0.659686	0.697917	0.66129	0.661538	0.638298	0.647059	0.702564	0.677083	0.0990099	0.155	0.661458	0.581395	0.679144	0.675393	0.666667	0.671875	0.647059	0.683673	0.685864	0.697917	0.680851	0.707692	0.695876	0.708333	0.16	0.0990099	0.680412	0.675393	0.68984	0.626943	0.0891089
AtRabB1c	0.525773	0.560209	0.557214	0.564767	0.647059	0.518135	0.541872	0.541872	0.530303	0.580488	0.534314	0.664894	0.536946	0.55665	0.541872	0.630682	0.540404	0.539216	0.652406	0.00966184	0.638743	0.529703	0.541667	0.510417	0.536946	0.544554	0.697917	0.680628	0.664894	0.624277	0.578125	0.566502	0.534314	0.535354	0.510417	0.57561	0.566502	0.00966184	0.569948	0.53202	0.527094	0.135266	0.691099	0.697917	0.541872	0.564356	0.537688	0.664894	0.692708
AtRabA1e	0.532338	0.594872	0.436893	0.615	0.677249	0.502564	0.293839	0.366667	0.541463	0.461905	0.292453	0.694737	0.169811	0.468599	0.427885	0.590164	0.546341	0.439614	0.691489	0.522167	0.615385	0.366667	0.548718	0.505155	0.183962	0.403846	0.697436	0.690722	0.687831	0.588889	0.603015	0.468599	0.423077	0.546341	0.505155	0.457547	0.454106	0.522167	0.605	0.169811	0.279621	0.536946	0.695876	0.697436	0.361905	0.429952	0.420792	0.694737	0.702564
AtRabH1c	0.673684	0.663102	0.702564	0.663158	0.65285	0.647368	0.693878	0.668367	0.670103	0.713568	0.680203	0.634021	0.688776	0.678571	0.690722	0.634286	0.680412	0.687179	0.666667	0.678571	0.663102	0.668367	0.634921	0.640212	0.704082	0.680412	0.168317	0.19	0.668394	0.606936	0.657895	0.658163	0.678571	0.675258	0.640212	0.703518	0.675258	0.678571	0.663158	0.704082	0.69898	0.688776	0.195	0.168317	0.673469	0.694301	0.675393	0.634021	0.158416
AtRabD2c	0.410256	0.507772	0.565445	0.510204	0.634409	0.147208	0.533333	0.528205	0.416244	0.574359	0.523077	0.636364	0.530928	0.53125	0.559585	0.624277	0.413265	0.53125	0.659459	0.520833	0.603261	0.502591	0.204082	0.0812183	0.525773	0.523316	0.641711	0.67027	0.655914	0.616279	0.512821	0.552083	0.549223	0.413265	0.0812183	0.569231	0.539267	0.520833	0.494898	0.525773	0.528205	0.515625	0.67027	0.641711	0.523077	0.536458	0.515957	0.636364	0.641711
AtRabB1a	0.513228	0.553763	0.545918	0.547872	0.642857	0.521277	0.535354	0.563452	0.528497	0.572864	0.520202	0.661202	0.550505	0.553299	0.542714	0.630682	0.528497	0.545	0.648352	0.165	0.625	0.548223	0.542553	0.502674	0.540404	0.540404	0.68984	0.666667	0.661202	0.606936	0.561497	0.558376	0.53	0.528497	0.502674	0.572864	0.565	0.165	0.547872	0.540404	0.530303	0.25	0.672043	0.68984	0.563452	0.553299	0.523316	0.661202	0.68984
AtRabB1b	0.515464	0.539267	0.567164	0.544041	0.647059	0.518135	0.541872	0.522167	0.530303	0.590244	0.52451	0.659574	0.551724	0.581281	0.571429	0.630682	0.525253	0.529412	0.647059	0.130435	0.628272	0.509901	0.53125	0.494792	0.546798	0.559406	0.697917	0.691099	0.654255	0.624277	0.552083	0.586207	0.578431	0.515152	0.494792	0.585366	0.551724	0.130435	0.544041	0.546798	0.536946	0.0869565	0.701571	0.697917	0.522167	0.574257	0.547739	0.659574	0.692708
AtRabG3a	0.631016	0.645161	0.652174	0.647059	0.285	0.652406	0.675532	0.650794	0.632979	0.668421	0.671958	0.265	0.650794	0.648649	0.631016	0.67052	0.625668	0.681081	0.16	0.659574	0.653846	0.636842	0.647059	0.639785	0.661376	0.655914	0.65625	0.675393	0.169154	0.656977	0.650538	0.643243	0.604278	0.631016	0.639785	0.663158	0.67027	0.659574	0.641711	0.656085	0.675532	0.664894	0.670157	0.65625	0.650794	0.648649	0.664835	0.265	0.65625
AtRabA4b	0.581281	0.591837	0.461538	0.618812	0.664865	0.53886	0.413462	0.402913	0.587379	0.366197	0.403846	0.66129	0.415459	0.440191	0.376744	0.6	0.594203	0.509524	0.659459	0.532338	0.618557	0.404878	0.526042	0.541667	0.42029	0.201835	0.680628	0.673684	0.654054	0.593407	0.595	0.440191	0.362791	0.584541	0.541667	0.376147	0.514286	0.532338	0.625616	0.410628	0.403846	0.557214	0.678947	0.680628	0.398058	0.18894	0.441176	0.66129	0.680628
AtRabF2b	0.619048	0.643243	0.619792	0.659574	0.657459	0.583784	0.594872	0.603093	0.621762	0.618557	0.574359	0.664835	0.6	0.626943	0.602041	0.45	0.61658	0.6	0.651934	0.633508	0.193878	0.56701	0.589189	0.576087	0.6	0.625641	0.623656	0.654054	0.648352	0.412429	0.652406	0.626943	0.596939	0.621762	0.576087	0.627551	0.610256	0.633508	0.664894	0.6	0.584615	0.628272	0.648649	0.623656	0.597938	0.618557	0.601064	0.664835	0.623656
AtRabA1d	0.555	0.574359	0.436275	0.605	0.668449	0.533333	0.148325	0.294686	0.568627	0.444444	0.181818	0.670213	0.201923	0.443902	0.410628	0.61326	0.566502	0.412621	0.666667	0.54	0.606218	0.330097	0.530928	0.530928	0.1875	0.386473	0.6875	0.715789	0.657754	0.6	0.577889	0.44878	0.400966	0.571429	0.530928	0.444976	0.434146	0.54	0.6	0.173077	0.129187	0.55	0.7	0.6875	0.299517	0.38835	0.45	0.670213	0.6875
AtRabA3	0.593137	0.633166	0.488038	0.651961	0.673684	0.588832	0.47619	0.4689	0.596154	0.293333	0.483412	0.691099	0.438095	0.492891	0.415094	0.597826	0.591346	0.514423	0.661376	0.585366	0.653061	0.451923	0.576531	0.576531	0.442857	0.389671	0.693878	0.676923	0.668421	0.59116	0.635468	0.50237	0.429907	0.596154	0.576531	0.266376	0.495192	0.585366	0.653659	0.438095	0.480952	0.590244	0.687179	0.693878	0.454545	0.400943	0.492683	0.691099	0.693878
AtRabA1i	0.559406	0.581633	0.444444	0.60199	0.656085	0.540816	0.29717	0.364929	0.563107	0.464455	0.295775	0.652632	0.108491	0.490385	0.411483	0.590164	0.558252	0.461538	0.638298	0.534314	0.615385	0.361905	0.558974	0.533333	0.117925	0.401914	0.687179	0.690722	0.640212	0.572222	0.585	0.485577	0.406699	0.572816	0.533333	0.469484	0.463768	0.534314	0.59204	0.113208	0.278302	0.558824	0.695876	0.687179	0.364929	0.408654	0.448276	0.652632	0.687179
AtRabD2a	0.392857	0.494845	0.557292	0.51269	0.647059	0.0757576	0.530612	0.535714	0.39899	0.591837	0.510204	0.632979	0.533333	0.554404	0.541237	0.630058	0.395939	0.53886	0.666667	0.528497	0.583784	0.515464	0.213198	0.101523	0.528205	0.536082	0.638298	0.666667	0.668449	0.622093	0.520408	0.559585	0.546392	0.395939	0.106599	0.581633	0.546875	0.528497	0.497462	0.528205	0.520408	0.533679	0.666667	0.638298	0.530612	0.528497	0.529101	0.632979	0.638298
AtRabA6b	0.563725	0.567839	0.485714	0.566502	0.661458	0.538071	0.433962	0.450237	0.572115	0.523364	0.469484	0.663212	0.481132	0.473934	0.518868	0.606557	0.576923	0.278302	0.675393	0.560386	0.622449	0.481132	0.530612	0.540816	0.466981	0.504717	0.675127	0.668367	0.671875	0.588889	0.571429	0.478673	0.504673	0.576923	0.540816	0.534562	0.308057	0.560386	0.571429	0.457547	0.438679	0.536232	0.668367	0.675127	0.454976	0.49763	0.461165	0.663212	0.675127
AtRabC1	0.562814	0.29902	0.574359	0.131068	0.66129	0.515464	0.565657	0.593909	0.572139	0.61809	0.550505	0.663102	0.57868	0.609137	0.625	0.628571	0.575	0.566327	0.643243	0.557292	0.645161	0.574359	0.512953	0.518135	0.573604	0.595	0.681081	0.661202	0.645161	0.626437	0.278049	0.604061	0.621891	0.565	0.518135	0.625616	0.591837	0.557292	0.131068	0.573604	0.565657	0.520833	0.655738	0.681081	0.588832	0.58794	0.575916	0.663102	0.681081
AtRabA2b	0.567164	0.581633	0.44878	0.62	0.663102	0.556122	0.320574	0.105263	0.578431	0.429952	0.30622	0.675532	0.350962	0.451456	0.400966	0.563536	0.568627	0.432039	0.682796	0.539604	0.582474	0.251208	0.548718	0.533333	0.341346	0.338164	0.661458	0.685864	0.679144	0.550562	0.58794	0.441748	0.396135	0.578431	0.533333	0.430622	0.443902	0.539604	0.615	0.326923	0.301435	0.539604	0.691099	0.661458	0.105263	0.359223	0.442786	0.675532	0.661458
AtRabA1a	0.565	0.572165	0.463415	0.582915	0.663102	0.510309	0.22381	0.320574	0.573529	0.464115	0.132701	0.675532	0.280952	0.475728	0.42029	0.601093	0.573529	0.427184	0.682796	0.529703	0.601036	0.331731	0.528497	0.510309	0.271429	0.400966	0.689119	0.692708	0.684492	0.594444	0.575758	0.466019	0.410628	0.563725	0.510309	0.464455	0.439024	0.529703	0.577889	0.27619	0.204762	0.539604	0.6875	0.689119	0.315789	0.412621	0.462687	0.675532	0.689119
AtRabA2a	0.552764	0.572165	0.460784	0.611111	0.62963	0.541237	0.30622	0.239234	0.551724	0.432692	0.309524	0.652632	0.342857	0.473171	0.402913	0.56044	0.566502	0.439024	0.62766	0.539604	0.597938	0.146919	0.530928	0.523316	0.342857	0.378641	0.661538	0.675258	0.634921	0.553073	0.583756	0.468293	0.402913	0.566502	0.523316	0.438095	0.458537	0.539604	0.611111	0.338095	0.315789	0.539604	0.670103	0.661538	0.253589	0.395122	0.455	0.652632	0.65641
AtRabG3b	0.63587	0.661202	0.629834	0.657609	0.253807	0.657609	0.659459	0.672043	0.637838	0.679144	0.66129	0.269036	0.623656	0.664835	0.619565	0.66474	0.630435	0.68306	0.156566	0.67027	0.657459	0.631016	0.668478	0.650273	0.634409	0.646739	0.645503	0.664894	0.161616	0.656977	0.661202	0.653846	0.597826	0.63587	0.650273	0.679144	0.677596	0.67027	0.657609	0.623656	0.659459	0.664865	0.659574	0.645503	0.677419	0.63388	0.648045	0.269036	0.645503
AtRabA6a	0.573529	0.582915	0.490476	0.581281	0.671875	0.543147	0.424528	0.440758	0.581731	0.509174	0.446009	0.678756	0.462264	0.492891	0.537037	0.617486	0.581731	0.283721	0.670157	0.570048	0.607143	0.481132	0.52551	0.55102	0.466981	0.523148	0.690355	0.688776	0.671875	0.611111	0.581281	0.49763	0.527523	0.586538	0.55102	0.520362	0.313084	0.570048	0.581281	0.466981	0.429245	0.545894	0.688776	0.690355	0.445498	0.511628	0.470874	0.678756	0.690355
AtRabA5e	0.58209	0.56701	0.169014	0.58	0.657609	0.552083	0.468599	0.44878	0.583333	0.515695	0.468599	0.659459	0.436893	0.361502	0.473684	0.617486	0.590244	0.509709	0.644809	0.572139	0.635417	0.455882	0.554974	0.539267	0.427184	0.461905	0.7	0.677249	0.646739	0.611111	0.562814	0.356808	0.47619	0.590244	0.539267	0.519824	0.5	0.572139	0.597015	0.432039	0.458937	0.577114	0.68254	0.7	0.44878	0.454545	0.206731	0.659459	0.7
AtRabG3e	0.641711	0.672043	0.679348	0.673797	0.0945274	0.647059	0.670213	0.650794	0.643617	0.673684	0.671958	0.129353	0.666667	0.697297	0.645161	0.66474	0.647059	0.681081	0.281407	0.657754	0.657459	0.626316	0.647059	0.629032	0.661376	0.666667	0.635417	0.633508	0.285	0.662791	0.677419	0.691892	0.629032	0.641711	0.629032	0.673684	0.681081	0.657754	0.679144	0.656085	0.670213	0.657754	0.633508	0.635417	0.656085	0.659459	0.681319	0.129353	0.635417
AtRabA1b	0.552239	0.553846	0.432039	0.585	0.679144	0.523077	0.127962	0.296651	0.560976	0.435407	0.161137	0.680851	0.247619	0.458937	0.403846	0.579235	0.565854	0.400966	0.66129	0.544554	0.589744	0.3125	0.546392	0.525773	0.238095	0.389423	0.699482	0.723958	0.663102	0.572222	0.557789	0.449275	0.394231	0.560976	0.525773	0.450237	0.417476	0.544554	0.58	0.247619	0.109005	0.554455	0.708333	0.699482	0.30622	0.396135	0.440594	0.680851	0.699482
AtRabG3d	0.631016	0.66129	0.657609	0.652406	0.139303	0.631016	0.664894	0.656085	0.632979	0.668421	0.677249	0.0845771	0.640212	0.67027	0.645161	0.65896	0.625668	0.691892	0.231156	0.657754	0.651934	0.631579	0.631016	0.61828	0.656085	0.655914	0.609375	0.60733	0.235	0.651163	0.66129	0.654054	0.623656	0.631016	0.61828	0.668421	0.675676	0.657754	0.663102	0.656085	0.664894	0.652406	0.60733	0.609375	0.661376	0.648649	0.648352	0.0845771	0.609375
AtRabG3f	0.614973	0.655914	0.663043	0.652406	0.0696517	0.625668	0.659574	0.645503	0.617021	0.673684	0.661376	0.109453	0.656085	0.675676	0.650538	0.653179	0.620321	0.675676	0.256281	0.641711	0.657459	0.610526	0.620321	0.602151	0.656085	0.655914	0.609375	0.612565	0.26	0.639535	0.655914	0.675676	0.629032	0.614973	0.602151	0.673684	0.67027	0.641711	0.657754	0.656085	0.659574	0.636364	0.60733	0.609375	0.650794	0.648649	0.664835	0.109453	0.614583
AtRabG3c	0.631016	0.672043	0.657609	0.652406	0.154229	0.636364	0.664894	0.687831	0.632979	0.678947	0.677249	0.0995025	0.645503	0.675676	0.655914	0.66474	0.625668	0.691892	0.246231	0.668449	0.646409	0.636842	0.631016	0.629032	0.666667	0.672043	0.609375	0.617801	0.25	0.651163	0.672043	0.664865	0.634409	0.636364	0.629032	0.678947	0.675676	0.668449	0.663102	0.661376	0.664894	0.657754	0.60733	0.609375	0.693122	0.67027	0.653846	0.0995025	0.609375
AtRabE1a	0.0483092	0.540404	0.604878	0.571429	0.614973	0.436548	0.572816	0.558824	0.0904762	0.618357	0.587379	0.638298	0.565854	0.595122	0.614634	0.610811	0.07109	0.563725	0.634409	0.545455	0.626943	0.566502	0.438776	0.423469	0.556098	0.613527	0.671875	0.696335	0.641711	0.587912	0.547264	0.6	0.614634	0.07109	0.423469	0.626794	0.596059	0.545455	0.578431	0.560976	0.572816	0.535354	0.696335	0.671875	0.558824	0.606796	0.59204	0.638298	0.671875
AtRabA1g	0.537313	0.574359	0.456311	0.605	0.656085	0.528205	0.265403	0.342857	0.546341	0.461905	0.273585	0.663158	0.0896226	0.47343	0.427885	0.579235	0.55122	0.449275	0.648936	0.527094	0.605128	0.342857	0.553846	0.520619	0.103774	0.399038	0.692308	0.695876	0.650794	0.566667	0.577889	0.47343	0.423077	0.55122	0.520619	0.466981	0.463768	0.527094	0.6	0.0990566	0.246445	0.551724	0.701031	0.692308	0.333333	0.415459	0.450495	0.663158	0.692308
AtRabA5b	0.562814	0.573684	0.212264	0.581633	0.677596	0.513089	0.453659	0.433498	0.569307	0.487923	0.458537	0.673913	0.446078	0.364929	0.47549	0.585635	0.561576	0.495098	0.659341	0.56	0.578947	0.445545	0.526316	0.510526	0.441176	0.451456	0.677249	0.666667	0.661202	0.58427	0.569231	0.36019	0.47549	0.571429	0.510526	0.480769	0.487685	0.56	0.593909	0.446078	0.443902	0.555	0.68254	0.677249	0.433498	0.439024	0.177885	0.673913	0.677249
AtRabC2b	0.56701	0.201005	0.613757	0.325	0.690608	0.552632	0.601036	0.609375	0.571429	0.637306	0.585492	0.692308	0.59375	0.623037	0.630769	0.668571	0.569231	0.588542	0.690608	0.582888	0.677419	0.610526	0.52381	0.529101	0.583333	0.639175	0.672222	0.662921	0.692308	0.655172	0.22	0.612565	0.632653	0.569231	0.529101	0.639594	0.578125	0.582888	0.305	0.588542	0.601036	0.561497	0.662921	0.672222	0.598958	0.642487	0.6	0.692308	0.672222
AtRabD1	0.426396	0.510204	0.5625	0.530303	0.620321	0.262626	0.55102	0.52551	0.432161	0.580808	0.556122	0.638298	0.564103	0.549223	0.553846	0.624277	0.429293	0.546392	0.645161	0.528497	0.605405	0.520619	0.142132	0.238579	0.548718	0.548718	0.654255	0.666667	0.647059	0.622093	0.515152	0.559585	0.545918	0.429293	0.238579	0.580808	0.559585	0.528497	0.520202	0.548718	0.55102	0.53886	0.672043	0.654255	0.530612	0.561856	0.539683	0.638298	0.654255
AtRabA4d	0.590909	0.615385	0.44335	0.648241	0.630435	0.528796	0.436893	0.377451	0.59901	0.369668	0.359223	0.643243	0.390244	0.468293	0.12037	0.605556	0.60396	0.492823	0.597826	0.52	0.618557	0.369458	0.557895	0.526316	0.390244	0.257009	0.650794	0.666667	0.610811	0.59322	0.616162	0.458537	0.101852	0.60396	0.526316	0.375	0.492823	0.52	0.643216	0.385366	0.412621	0.55	0.677249	0.650794	0.362745	0.267606	0.43	0.643243	0.650794
AtRabA2c	0.559406	0.588832	0.453659	0.621891	0.650794	0.545918	0.338095	0.0995261	0.570732	0.433333	0.317536	0.657895	0.371429	0.436893	0.413462	0.574586	0.570732	0.434783	0.680851	0.53202	0.592784	0.267943	0.533333	0.528205	0.361905	0.350962	0.680412	0.694301	0.677249	0.561798	0.595	0.432039	0.408654	0.560976	0.528205	0.424528	0.451456	0.53202	0.616915	0.352381	0.319048	0.527094	0.699482	0.680412	0.109005	0.36715	0.41791	0.657895	0.680412
AtRabE1c	0.0483092	0.540404	0.590244	0.571429	0.625668	0.426396	0.563107	0.558824	0.0809524	0.613527	0.587379	0.648936	0.556098	0.580488	0.609756	0.616216	0.0758294	0.573529	0.645161	0.540404	0.637306	0.55665	0.438776	0.423469	0.546341	0.603865	0.677083	0.696335	0.647059	0.604396	0.552239	0.585366	0.609756	0.0616114	0.423469	0.626794	0.591133	0.540404	0.578431	0.55122	0.563107	0.535354	0.701571	0.677083	0.54902	0.597087	0.577114	0.648936	0.677083
AtRabF1	0.586592	0.616279	0.588889	0.638418	0.651163	0.610465	0.572222	0.550562	0.593407	0.577778	0.555556	0.668605	0.566667	0.594444	0.586592	0.175	0.593407	0.588889	0.651163	0.641618	0.384181	0.547486	0.610465	0.610465	0.561111	0.56044	0.581395	0.588235	0.651163	0.125	0.64	0.588889	0.586592	0.582418	0.610465	0.571429	0.605556	0.641618	0.640449	0.555556	0.577778	0.653179	0.594118	0.581395	0.55618	0.554945	0.587571	0.668605	0.581395
AtRabE1e	0.125604	0.540404	0.616505	0.558824	0.609626	0.431472	0.565217	0.560976	0.142857	0.605769	0.565217	0.62766	0.572816	0.587379	0.616505	0.627027	0.151659	0.595122	0.623656	0.552764	0.639175	0.563725	0.413265	0.413265	0.563107	0.615385	0.663212	0.692708	0.631016	0.598901	0.554455	0.592233	0.616505	0.137441	0.413265	0.604762	0.612745	0.552764	0.560976	0.567961	0.565217	0.552764	0.692708	0.663212	0.560976	0.613527	0.589109	0.62766	0.663212
AtRabF2a	0.640212	0.637838	0.59375	0.659574	0.657459	0.589189	0.589744	0.608247	0.642487	0.623711	0.579487	0.664835	0.605128	0.621762	0.602041	0.444444	0.642487	0.594872	0.646409	0.617801	0.183673	0.582474	0.605405	0.581522	0.605128	0.625641	0.634409	0.643243	0.642857	0.40678	0.641711	0.61658	0.586735	0.642487	0.581522	0.627551	0.615385	0.617801	0.664894	0.610256	0.579487	0.612565	0.648649	0.634409	0.608247	0.623711	0.595745	0.664835	0.634409
AtRabA5a	0.577114	0.592784	0.361502	0.585	0.67027	0.544041	0.451923	0.427184	0.585366	0.4689	0.466346	0.672043	0.458937	0.125	0.495192	0.601093	0.585366	0.495192	0.657609	0.561576	0.606218	0.473171	0.53125	0.536458	0.458937	0.433333	0.675393	0.668421	0.659459	0.588889	0.582915	0.101852	0.475962	0.585366	0.536458	0.485849	0.485577	0.561576	0.587065	0.458937	0.442308	0.576355	0.684211	0.675393	0.427184	0.447619	0.331731	0.672043	0.675393
AtRabA2d	0.554455	0.57868	0.44878	0.621891	0.661376	0.556122	0.342857	0.109005	0.570732	0.428571	0.322275	0.663158	0.357143	0.446602	0.394231	0.58011	0.570732	0.449275	0.675532	0.536946	0.597938	0.263158	0.548718	0.533333	0.347619	0.346154	0.670103	0.683938	0.671958	0.567416	0.585	0.436893	0.399038	0.560976	0.533333	0.419811	0.466019	0.536946	0.616915	0.333333	0.32381	0.541872	0.694301	0.670103	0.113744	0.36715	0.432836	0.663158	0.670103
AtRabC2a	0.562814	0.142157	0.587629	0.302439	0.682796	0.553846	0.575758	0.593909	0.572139	0.626263	0.565657	0.679144	0.583756	0.612245	0.625	0.651429	0.57	0.571429	0.677419	0.572917	0.650538	0.579487	0.515464	0.520619	0.568528	0.61809	0.691892	0.677596	0.679144	0.643678	0.15122	0.602041	0.621891	0.565	0.520619	0.633663	0.576531	0.572917	0.292683	0.573604	0.575758	0.546875	0.677596	0.691892	0.57868	0.611111	0.578947	0.679144	0.691892
AtRabD2b	0.410256	0.502591	0.570681	0.510204	0.634409	0.152284	0.533333	0.528205	0.416244	0.574359	0.523077	0.636364	0.530928	0.536458	0.559585	0.624277	0.413265	0.53125	0.659459	0.53125	0.603261	0.502591	0.209184	0.0812183	0.525773	0.528497	0.647059	0.67027	0.655914	0.616279	0.507692	0.552083	0.549223	0.413265	0.0812183	0.569231	0.539267	0.53125	0.494898	0.525773	0.528205	0.526042	0.67027	0.647059	0.517949	0.536458	0.521277	0.636364	0.647059
AtRabH1e	0.664894	0.690217	0.694737	0.702128	0.640625	0.659574	0.71134	0.685567	0.666667	0.688776	0.697436	0.621762	0.707692	0.680628	0.682292	0.609195	0.671875	0.696335	0.659686	0.6875	0.655914	0.666667	0.62766	0.657754	0.712821	0.682292	0.0792079	0.125	0.65625	0.587209	0.684492	0.675393	0.671875	0.666667	0.657754	0.688776	0.685864	0.6875	0.696809	0.717949	0.716495	0.703125	0.125	0.0792079	0.685567	0.680628	0.695187	0.621762	0.0891089
AtRabH1a	0.668449	0.686813	0.684211	0.693548	0.621053	0.655914	0.704663	0.689119	0.670157	0.692308	0.701031	0.60733	0.71134	0.706806	0.685864	0.612717	0.664921	0.684211	0.656085	0.717277	0.643243	0.675258	0.66129	0.654054	0.71134	0.706806	0.24	0.271357	0.647368	0.6	0.691892	0.706806	0.685864	0.675393	0.654054	0.687179	0.668421	0.717277	0.688172	0.716495	0.699482	0.722513	0.271357	0.24	0.689119	0.705263	0.679144	0.60733	0.24
AtRabA4c	0.59	0.614213	0.421569	0.641791	0.641304	0.533679	0.423077	0.38835	0.593137	0.363208	0.384615	0.654054	0.381643	0.439614	0.230415	0.615385	0.598039	0.49763	0.63587	0.539604	0.623711	0.395122	0.53125	0.536458	0.386473	0.283721	0.678947	0.68254	0.632432	0.608939	0.625	0.439614	0.225806	0.593137	0.536458	0.359447	0.49763	0.539604	0.641791	0.381643	0.403846	0.559406	0.693122	0.678947	0.373786	0.283721	0.427861	0.654054	0.678947
AtRabA1c	0.562189	0.569231	0.456311	0.595	0.657754	0.512821	0.146919	0.311005	0.570732	0.464115	0.184834	0.659574	0.228571	0.478261	0.430622	0.601093	0.57561	0.403846	0.650538	0.534653	0.6	0.322115	0.530928	0.515464	0.214286	0.38756	0.683938	0.708333	0.647059	0.583333	0.572864	0.483092	0.411483	0.580488	0.515464	0.459716	0.415459	0.534653	0.59	0.209524	0.118483	0.539604	0.692708	0.683938	0.320574	0.389423	0.460396	0.659574	0.683938
AtRabG1	0.657754	0.668449	0.666667	0.679144	0.469388	0.672043	0.652406	0.680851	0.659574	0.684211	0.670213	0.484694	0.668449	0.652174	0.663102	0.666667	0.663102	0.654054	0.425641	0.657754	0.664804	0.654255	0.654054	0.654054	0.663102	0.672043	0.671958	0.677249	0.423469	0.658683	0.655914	0.646739	0.652406	0.657754	0.654054	0.678947	0.668478	0.657754	0.673797	0.657754	0.652406	0.641711	0.671958	0.671958	0.696809	0.681081	0.664835	0.484694	0.671958
AtRabE1d	0.106796	0.540404	0.612745	0.55665	0.614973	0.426396	0.55122	0.561576	0.124402	0.61165	0.556098	0.632979	0.553922	0.578431	0.607843	0.627027	0.138095	0.591133	0.634409	0.548223	0.630208	0.559406	0.428571	0.413265	0.544118	0.606796	0.659686	0.689474	0.636364	0.598901	0.547264	0.578431	0.612745	0.128571	0.413265	0.610577	0.608911	0.548223	0.558824	0.54902	0.55122	0.548223	0.694737	0.659686	0.561576	0.6	0.585	0.632979	0.659686
AtRabA1f	0.537313	0.574359	0.427184	0.595	0.650794	0.517949	0.255924	0.32381	0.546341	0.442857	0.264151	0.657895	0.0566038	0.458937	0.408654	0.584699	0.55122	0.439614	0.648936	0.527094	0.605128	0.333333	0.54359	0.510309	0.0707547	0.394231	0.697436	0.701031	0.650794	0.572222	0.577889	0.458937	0.403846	0.546341	0.510309	0.45283	0.454106	0.527094	0.59	0.0660377	0.246445	0.551724	0.706186	0.697436	0.32381	0.410628	0.440594	0.657895	0.697436
AtRabA4a	0.607843	0.621212	0.45933	0.647059	0.668449	0.558974	0.433333	0.379808	0.615385	0.351852	0.404762	0.664894	0.425837	0.440758	0.348624	0.6	0.620192	0.497653	0.645161	0.541872	0.632653	0.42029	0.541237	0.551546	0.430622	0.127273	0.678756	0.682292	0.641711	0.593407	0.613861	0.43128	0.344037	0.615385	0.551546	0.352941	0.521127	0.541872	0.64878	0.421053	0.419048	0.55665	0.692708	0.678756	0.375	0.136986	0.44878	0.664894	0.673575
OsRab20	0.579487	0.606218	0.41206	0.630769	0.642857	0.542105	0.40099	0.348259	0.580808	0.317073	0.386139	0.644809	0.383085	0.40796	0.333333	0.573034	0.592965	0.492683	0.622951	0.535	0.6	0.38	0.52381	0.539683	0.38806	0.2	0.673797	0.672043	0.628415	0.565714	0.603093	0.402985	0.32381	0.592965	0.539683	0.319048	0.497561	0.535	0.630769	0.378109	0.391089	0.545	0.682796	0.673797	0.343284	0.157143	0.397959	0.644809	0.673797
OsRab21	0.606742	0.626437	0.603352	0.634831	0.639535	0.596491	0.586592	0.564972	0.61326	0.623711	0.569832	0.656977	0.569832	0.616667	0.596685	0.241206	0.61326	0.608939	0.639535	0.641618	0.357955	0.55618	0.608187	0.590643	0.575419	0.584699	0.573099	0.573964	0.639535	0.19598	0.653409	0.611111	0.604396	0.607735	0.584795	0.626263	0.616667	0.641618	0.631285	0.564246	0.592179	0.641618	0.579882	0.573099	0.553672	0.584699	0.607955	0.656977	0.573099
OsRab16	0.597015	0.59375	0.221698	0.585859	0.659459	0.564767	0.468599	0.453659	0.602941	0.488038	0.439614	0.650538	0.441748	0.35545	0.446602	0.606557	0.6	0.490291	0.63587	0.569307	0.645833	0.441176	0.557292	0.552083	0.432039	0.4375	0.685864	0.673684	0.648649	0.6	0.583756	0.341232	0.446602	0.609756	0.552083	0.485714	0.478049	0.569307	0.603015	0.436893	0.454106	0.579208	0.684211	0.685864	0.453659	0.439614	0.240385	0.650538	0.685864
OsRab15	0.57	0.590674	0.367925	0.613065	0.652174	0.546875	0.454106	0.409756	0.583333	0.490385	0.458937	0.664865	0.451456	0.2	0.468599	0.590164	0.583333	0.502415	0.644809	0.539604	0.621762	0.455882	0.528796	0.528796	0.451456	0.421053	0.678947	0.671958	0.641304	0.588889	0.580808	0.204651	0.463768	0.583333	0.528796	0.483412	0.497585	0.539604	0.61	0.451456	0.439614	0.554455	0.687831	0.678947	0.414634	0.440191	0.333333	0.664865	0.678947
OsRab13	0.057971	0.535354	0.598039	0.576355	0.625668	0.42132	0.560976	0.566502	0.0857143	0.606796	0.580488	0.638298	0.558824	0.578431	0.607843	0.61413	0.0857143	0.576355	0.639785	0.543147	0.630208	0.564356	0.433673	0.413265	0.54902	0.601942	0.675393	0.694737	0.641711	0.604396	0.552239	0.583333	0.602941	0.0857143	0.413265	0.620192	0.594059	0.543147	0.583333	0.553922	0.560976	0.553299	0.694737	0.675393	0.561576	0.604878	0.57	0.638298	0.675393
OsRab14	0.671958	0.679348	0.685864	0.68617	0.619792	0.664894	0.707692	0.682051	0.668394	0.690355	0.693878	0.611399	0.709184	0.666667	0.689119	0.605714	0.673575	0.6875	0.65445	0.694301	0.657754	0.678571	0.632979	0.657754	0.714286	0.689119	0.10396	0.0945274	0.65625	0.569767	0.679144	0.666667	0.683938	0.673575	0.657754	0.690355	0.677083	0.694301	0.680851	0.719388	0.712821	0.704663	0.0945274	0.10396	0.682051	0.6875	0.68617	0.611399	0.113861
OsRab2	0.632979	0.663102	0.643243	0.670213	0.134328	0.632979	0.666667	0.668421	0.634921	0.675393	0.678947	0.0742574	0.657895	0.688172	0.652406	0.66474	0.638298	0.693548	0.236181	0.638298	0.653846	0.65445	0.638298	0.620321	0.657895	0.657754	0.621762	0.619792	0.235	0.656977	0.668449	0.672043	0.636364	0.632979	0.620321	0.670157	0.688172	0.638298	0.680851	0.657895	0.666667	0.638298	0.619792	0.621762	0.673684	0.655914	0.644809	0.0742574	0.621762
OsRab4	0.643617	0.666667	0.648649	0.659574	0.273632	0.654255	0.677249	0.684211	0.650794	0.65445	0.673684	0.278607	0.647368	0.677419	0.641711	0.666667	0.638298	0.682796	0.17	0.675532	0.659341	0.643979	0.654255	0.647059	0.657895	0.647059	0.65285	0.666667	0.174129	0.653179	0.673797	0.66129	0.625668	0.638298	0.647059	0.65445	0.682796	0.675532	0.654255	0.652632	0.677249	0.659574	0.661458	0.65285	0.689474	0.634409	0.655738	0.278607	0.65285
OsRab3	0.392857	0.5	0.520833	0.507614	0.631016	0.151515	0.530612	0.505102	0.40404	0.586735	0.535714	0.62234	0.558974	0.512953	0.561856	0.624277	0.395939	0.53886	0.645161	0.518135	0.583784	0.505155	0.213198	0.106599	0.548718	0.515464	0.648936	0.666667	0.652406	0.610465	0.510204	0.528497	0.556701	0.395939	0.111675	0.586735	0.546875	0.518135	0.502538	0.553846	0.530612	0.502591	0.666667	0.648936	0.505102	0.528497	0.481481	0.62234	0.654255
OsRab1	0.428571	0.515	0.567839	0.526829	0.625668	0.126263	0.537313	0.55	0.434146	0.615741	0.542289	0.617021	0.55	0.557214	0.579208	0.633333	0.431373	0.530303	0.645161	0.528497	0.579787	0.515152	0.208122	0.071066	0.545	0.55665	0.643617	0.650538	0.647059	0.620112	0.536946	0.567164	0.576355	0.436275	0.0659898	0.618182	0.540404	0.528497	0.524272	0.545	0.527363	0.53886	0.650538	0.643617	0.545	0.559406	0.538462	0.617021	0.643617
OsRab6	0.552764	0.241379	0.601036	0.344828	0.684492	0.541237	0.57868	0.581633	0.56	0.588832	0.553299	0.68617	0.586735	0.605128	0.59799	0.643678	0.557789	0.579487	0.682796	0.565445	0.637838	0.56701	0.497409	0.512953	0.571429	0.59596	0.673913	0.68306	0.684492	0.630058	0.231527	0.6	0.595	0.547739	0.512953	0.597015	0.579487	0.565445	0.325123	0.576531	0.57868	0.554974	0.68306	0.673913	0.576531	0.573604	0.584211	0.68617	0.673913
OsRab8	0.527363	0.581633	0.478049	0.62	0.648936	0.545918	0.339713	0.138095	0.539216	0.427885	0.319048	0.656085	0.373206	0.432039	0.425121	0.563536	0.534314	0.432039	0.668449	0.551724	0.587629	0.274038	0.538462	0.517949	0.358852	0.357488	0.683938	0.6875	0.664894	0.550562	0.58794	0.436893	0.425121	0.539216	0.517949	0.433333	0.453659	0.551724	0.62	0.358852	0.330144	0.536946	0.703125	0.683938	0.138095	0.373786	0.447761	0.656085	0.683938
OsRab7	0.628272	0.638298	0.618557	0.652632	0.657459	0.596774	0.604061	0.607143	0.625641	0.619289	0.593909	0.648352	0.619289	0.620513	0.60101	0.436464	0.630769	0.604061	0.629834	0.635417	0.19898	0.591837	0.602151	0.583784	0.619289	0.614213	0.647059	0.655914	0.631868	0.398876	0.642105	0.620513	0.58794	0.630769	0.583784	0.623116	0.614213	0.635417	0.657895	0.614213	0.598985	0.635417	0.655914	0.647059	0.607143	0.607143	0.589474	0.648352	0.647059
OsRab5	0.533679	0.563158	0.545	0.557292	0.650538	0.520833	0.544554	0.544554	0.527919	0.588235	0.53202	0.668449	0.549505	0.559406	0.564356	0.636364	0.543147	0.536946	0.645161	0.0631068	0.628272	0.547264	0.549738	0.513089	0.539604	0.557214	0.706806	0.689474	0.652406	0.624277	0.570681	0.569307	0.541872	0.527919	0.518325	0.583333	0.564356	0.0631068	0.5625	0.534653	0.529703	0.145631	0.689474	0.706806	0.539604	0.577114	0.540404	0.668449	0.701571
OsRab18	0.56	0.57732	0.429268	0.59799	0.661376	0.517949	0.252381	0.339713	0.563725	0.438095	0.265403	0.668421	0.0805687	0.466019	0.405797	0.576923	0.568627	0.446602	0.654255	0.53202	0.618557	0.334928	0.548718	0.510309	0.0853081	0.381643	0.692308	0.71134	0.656085	0.564246	0.580808	0.470874	0.400966	0.568627	0.510309	0.440758	0.451456	0.53202	0.58794	0.0758294	0.242857	0.551724	0.71134	0.692308	0.339713	0.402913	0.435644	0.668421	0.692308
OsRab17	0.62069	0.634518	0.410628	0.655172	0.632432	0.551546	0.416268	0.371981	0.63285	0.35814	0.358852	0.639785	0.370192	0.447619	0.211982	0.6	0.63285	0.495283	0.61413	0.544554	0.603093	0.373786	0.53886	0.53886	0.379808	0.256881	0.680628	0.678947	0.610811	0.593407	0.631841	0.438095	0.198157	0.628019	0.53886	0.363636	0.485849	0.544554	0.656863	0.375	0.392344	0.564356	0.689474	0.680628	0.357488	0.247706	0.426471	0.639785	0.680628
OsRab19	0.62439	0.631841	0.5	0.634146	0.673575	0.593909	0.490476	0.473684	0.631579	0.394619	0.483412	0.695876	0.461905	0.490476	0.488479	0.616216	0.62201	0.526066	0.666667	0.591133	0.613402	0.480952	0.586735	0.586735	0.466667	0.440367	0.704082	0.676923	0.668394	0.604396	0.617647	0.490476	0.474886	0.626794	0.586735	0.368421	0.526066	0.591133	0.635922	0.466667	0.495238	0.596059	0.676923	0.704082	0.4689	0.456221	0.504902	0.695876	0.704082
OsRab12	0.552239	0.55102	0.441748	0.58209	0.668449	0.528205	0.189573	0.301435	0.560976	0.464115	0.170616	0.670213	0.190476	0.447115	0.409524	0.606557	0.565854	0.423077	0.650538	0.539604	0.605128	0.322115	0.530928	0.520619	0.185714	0.395238	0.704663	0.708333	0.647059	0.594444	0.555	0.4375	0.4	0.570732	0.520619	0.476415	0.423077	0.539604	0.577114	0.190476	0.165877	0.549505	0.703125	0.704663	0.291866	0.397129	0.455446	0.670213	0.704663
OsRab9	0.542289	0.57732	0.475728	0.59	0.631579	0.525773	0.328571	0.291866	0.546341	0.428571	0.327014	0.649215	0.336493	0.468599	0.418269	0.586957	0.556098	0.441748	0.645503	0.519802	0.618557	0.240566	0.541237	0.533679	0.36019	0.406699	0.682051	0.685567	0.647368	0.574586	0.606061	0.468599	0.413462	0.546341	0.533679	0.446009	0.466019	0.519802	0.59	0.350711	0.328571	0.534653	0.680412	0.682051	0.301435	0.413462	0.450495	0.649215	0.676923
OsRab11	0.54	0.582474	0.429268	0.603015	0.640212	0.528205	0.257143	0.330144	0.544118	0.447619	0.28436	0.652632	0.0853081	0.461165	0.42029	0.582418	0.544118	0.451456	0.643617	0.536946	0.623711	0.349282	0.54359	0.515464	0.0900474	0.386473	0.702564	0.706186	0.645503	0.569832	0.585859	0.466019	0.415459	0.544118	0.515464	0.450237	0.456311	0.536946	0.59799	0.0758294	0.242857	0.561576	0.71134	0.702564	0.339713	0.402913	0.435644	0.652632	0.702564
OsRab10	0.632979	0.657754	0.643243	0.648936	0.104478	0.611702	0.671958	0.652632	0.634921	0.664921	0.678947	0.0891089	0.663158	0.66129	0.652406	0.647399	0.638298	0.677419	0.236181	0.659574	0.653846	0.638743	0.611702	0.604278	0.663158	0.657754	0.611399	0.609375	0.235	0.645349	0.657754	0.655914	0.631016	0.632979	0.604278	0.659686	0.672043	0.659574	0.648936	0.663158	0.666667	0.648936	0.609375	0.611399	0.657895	0.650538	0.644809	0.0891089	0.611399
MtRab15	0.673797	0.693989	0.693122	0.695187	0.625	0.647059	0.694301	0.668394	0.670157	0.666667	0.675258	0.606218	0.695876	0.689474	0.664921	0.597701	0.680628	0.684211	0.643979	0.701571	0.650538	0.654639	0.631016	0.645161	0.71134	0.675393	0.0547264	0.145729	0.645833	0.569767	0.693548	0.673684	0.659686	0.680628	0.645161	0.661538	0.673684	0.701571	0.684492	0.706186	0.699482	0.701571	0.140704	0.0547264	0.668394	0.673684	0.688172	0.606218	0.0447761
MtRab14	0.624339	0.637838	0.604167	0.675532	0.646409	0.589189	0.6	0.587629	0.621762	0.608247	0.579487	0.67033	0.610256	0.601036	0.612245	0.411111	0.621762	0.589744	0.635359	0.633508	0.0255102	0.587629	0.594595	0.581522	0.605128	0.615385	0.645161	0.648649	0.631868	0.367232	0.636364	0.595855	0.596939	0.626943	0.581522	0.612245	0.610256	0.633508	0.675532	0.605128	0.594872	0.628272	0.654054	0.645161	0.587629	0.603093	0.590426	0.67033	0.645161
MtRab7	0.456853	0.515464	0.549223	0.51269	0.631016	0.252525	0.566327	0.545918	0.457286	0.568528	0.566327	0.632979	0.553846	0.546392	0.56701	0.62069	0.459596	0.549223	0.650538	0.544041	0.616216	0.520619	0.101523	0.22335	0.553846	0.523077	0.611702	0.634409	0.657754	0.618497	0.520408	0.556701	0.556701	0.459596	0.22335	0.558376	0.546875	0.544041	0.515152	0.553846	0.571429	0.549223	0.634409	0.611702	0.55102	0.541237	0.531579	0.632979	0.611702
MtRab8	0.576355	0.553846	0.447115	0.606965	0.631579	0.523077	0.322275	0.257143	0.584541	0.424528	0.330189	0.649215	0.339623	0.473684	0.394231	0.567568	0.57971	0.449275	0.640212	0.517241	0.605128	0.127962	0.517949	0.515464	0.34434	0.371429	0.678571	0.687179	0.642105	0.56044	0.577889	0.4689	0.394231	0.584541	0.515464	0.434579	0.449275	0.517241	0.59901	0.334906	0.317536	0.517241	0.687179	0.678571	0.257143	0.392344	0.45098	0.649215	0.678571
MtRab13	0.647368	0.652406	0.663102	0.652632	0.119403	0.636842	0.664921	0.65625	0.649215	0.683938	0.677083	0.0445545	0.65625	0.680851	0.666667	0.668571	0.652632	0.68617	0.25	0.666667	0.663043	0.642487	0.626316	0.624339	0.65625	0.671958	0.625641	0.623711	0.253731	0.66092	0.656085	0.675532	0.645503	0.647368	0.624339	0.683938	0.680851	0.666667	0.663158	0.65625	0.664921	0.661376	0.623711	0.625641	0.661458	0.664894	0.664865	0.0445545	0.625641
MtRab10	0.525773	0.560209	0.557214	0.564767	0.652406	0.523316	0.541872	0.541872	0.530303	0.585366	0.534314	0.664894	0.536946	0.55665	0.541872	0.625	0.540404	0.539216	0.652406	0.0144928	0.633508	0.534653	0.541667	0.515625	0.536946	0.539604	0.703125	0.691099	0.664894	0.624277	0.578125	0.566502	0.534314	0.535354	0.515625	0.580488	0.566502	0.0144928	0.569948	0.53202	0.527094	0.125604	0.701571	0.703125	0.541872	0.559406	0.537688	0.664894	0.697917
MtRab12	0.569307	0.561224	0.439614	0.577114	0.677249	0.520408	0.179245	0.293839	0.572816	0.459716	0.0610329	0.684211	0.264151	0.466346	0.401914	0.579235	0.582524	0.427885	0.675532	0.52451	0.6	0.32381	0.553846	0.528205	0.25	0.38756	0.687179	0.716495	0.671958	0.572222	0.56	0.466346	0.401914	0.572816	0.528205	0.455399	0.444444	0.52451	0.572139	0.25	0.15566	0.534314	0.701031	0.687179	0.298578	0.403846	0.438424	0.684211	0.687179
MtRab11	0.549505	0.566327	0.429952	0.597015	0.670213	0.510204	0.0377358	0.3	0.558252	0.447619	0.165094	0.677249	0.227488	0.471154	0.421053	0.579235	0.563107	0.413462	0.663102	0.536946	0.605128	0.320574	0.558974	0.517949	0.21327	0.392344	0.695876	0.720207	0.664894	0.572222	0.57	0.471154	0.416268	0.558252	0.517949	0.443396	0.42029	0.536946	0.59204	0.222749	0.0283019	0.546798	0.704663	0.695876	0.314286	0.403846	0.433498	0.677249	0.695876
MtRab9	0.537313	0.564103	0.436893	0.6	0.661376	0.533333	0.236967	0.333333	0.546341	0.433333	0.240566	0.668421	0.0613208	0.47343	0.408654	0.584699	0.55122	0.42029	0.654255	0.53202	0.615385	0.347619	0.548718	0.525773	0.0188679	0.394231	0.707692	0.71134	0.656085	0.561111	0.567839	0.47343	0.384615	0.546341	0.525773	0.433962	0.434783	0.53202	0.59	0.0377358	0.218009	0.55665	0.706186	0.707692	0.333333	0.410628	0.450495	0.668421	0.707692
MtRab28	0.607843	0.613065	0.490476	0.627451	0.661376	0.576531	0.464455	0.442857	0.610577	0.130045	0.471698	0.678947	0.440758	0.495283	0.394366	0.605405	0.615385	0.497608	0.664894	0.570732	0.622449	0.440191	0.548718	0.569231	0.43128	0.341121	0.671795	0.675258	0.671958	0.598901	0.610837	0.5	0.395349	0.615385	0.569231	0.123348	0.502392	0.570732	0.634146	0.43128	0.469194	0.57561	0.685567	0.671795	0.433333	0.347418	0.480583	0.678947	0.671795
MtRab29	0.586207	0.609137	0.447115	0.640394	0.672043	0.536082	0.406699	0.342995	0.589372	0.334884	0.392344	0.668449	0.399038	0.428571	0.327189	0.578378	0.599034	0.495283	0.639785	0.554455	0.615385	0.398058	0.523316	0.528497	0.403846	0.0545455	0.666667	0.659686	0.634409	0.571429	0.606965	0.419048	0.336406	0.599034	0.528497	0.35	0.504717	0.554455	0.642157	0.394231	0.392344	0.564356	0.670157	0.666667	0.333333	0.100457	0.421569	0.668449	0.666667
MtRab31	0.575758	0.29703	0.592784	0.131707	0.666667	0.512953	0.588832	0.607143	0.58	0.614213	0.568528	0.666667	0.591837	0.596939	0.633166	0.617143	0.577889	0.564103	0.654054	0.575916	0.643243	0.592784	0.489583	0.5	0.591837	0.628141	0.657609	0.659341	0.655914	0.614943	0.300493	0.596939	0.628141	0.577889	0.5	0.626866	0.584615	0.575916	0.126829	0.591837	0.593909	0.554974	0.653846	0.657609	0.602041	0.621212	0.578947	0.666667	0.657609
MtRab30	0.664894	0.695652	0.7	0.696809	0.625	0.648936	0.690722	0.675258	0.666667	0.678571	0.676923	0.606218	0.692308	0.680628	0.666667	0.597701	0.671875	0.685864	0.643979	0.697917	0.650538	0.661538	0.62766	0.647059	0.707692	0.671875	0.039604	0.155	0.645833	0.569767	0.695187	0.670157	0.661458	0.671875	0.647059	0.673469	0.675393	0.697917	0.68617	0.702564	0.695876	0.697917	0.145	0.039604	0.675258	0.670157	0.695187	0.606218	0.039604
MtRab26	0.554455	0.0833333	0.583756	0.322115	0.684492	0.543147	0.565	0.582915	0.568627	0.616915	0.565	0.691489	0.58794	0.613065	0.621891	0.640449	0.561576	0.570707	0.682796	0.557292	0.652406	0.593909	0.515306	0.520408	0.577889	0.618812	0.700535	0.702703	0.684492	0.621469	0.140097	0.603015	0.618812	0.55665	0.520408	0.634146	0.585859	0.557292	0.307692	0.577889	0.565	0.546875	0.691892	0.700535	0.572864	0.606965	0.580311	0.691489	0.700535
MtRab27	0.615764	0.597938	0.0654206	0.61	0.666667	0.551546	0.449761	0.458937	0.61165	0.509524	0.454545	0.668449	0.442308	0.370892	0.451923	0.616216	0.623188	0.504808	0.637838	0.571429	0.623711	0.461165	0.569948	0.554404	0.4375	0.438095	0.6875	0.685864	0.639785	0.60989	0.585859	0.370892	0.456731	0.618357	0.554404	0.5	0.497585	0.571429	0.621891	0.4375	0.435407	0.571429	0.691099	0.6875	0.458937	0.444976	0.192308	0.668449	0.6875
MtRab24	0.58	0.573684	0.194313	0.591837	0.672131	0.526316	0.463415	0.453202	0.579208	0.485437	0.453659	0.673913	0.45098	0.342857	0.470588	0.60221	0.581281	0.482759	0.648352	0.545455	0.605263	0.445545	0.52381	0.507937	0.446078	0.436893	0.68617	0.687831	0.650273	0.595506	0.564103	0.338095	0.45098	0.581281	0.507937	0.490385	0.490099	0.545455	0.593909	0.446078	0.458537	0.555556	0.698413	0.68617	0.453202	0.443902	0.0628019	0.673913	0.68617
MtRab25	0.4	0.492228	0.544503	0.5	0.634409	0.0609137	0.533333	0.533333	0.406091	0.594872	0.533333	0.631016	0.515464	0.541667	0.549223	0.624277	0.403061	0.536458	0.654054	0.520833	0.586957	0.525773	0.214286	0.0867347	0.520619	0.544041	0.636364	0.659459	0.655914	0.610465	0.507692	0.541667	0.533679	0.403061	0.0918367	0.584615	0.539267	0.520833	0.484694	0.520619	0.523077	0.515625	0.659459	0.636364	0.523077	0.557292	0.521277	0.631016	0.641711
MtRab21	0.68254	0.68306	0.673684	0.68984	0.614583	0.663102	0.706186	0.690722	0.677083	0.683673	0.697436	0.601036	0.692308	0.670157	0.666667	0.614943	0.677083	0.685864	0.65445	0.6875	0.645161	0.661538	0.631016	0.655914	0.702564	0.677083	0.119403	0.0746269	0.645833	0.584795	0.682796	0.670157	0.666667	0.6875	0.655914	0.683673	0.664921	0.6875	0.68984	0.702564	0.71134	0.703125	0.0845771	0.119403	0.690722	0.685864	0.670213	0.601036	0.119403
MtRab5	0.595506	0.622093	0.592179	0.636364	0.651163	0.619883	0.569832	0.553672	0.60221	0.597765	0.558659	0.668605	0.569832	0.603352	0.606742	0.0954774	0.60221	0.586592	0.651163	0.630058	0.375	0.544944	0.619883	0.608187	0.564246	0.574586	0.567251	0.591716	0.651163	0.0452261	0.637931	0.592179	0.606742	0.60221	0.608187	0.596685	0.597765	0.630058	0.638418	0.558659	0.575419	0.630058	0.597633	0.567251	0.559322	0.569061	0.596591	0.668605	0.567251
MtRab2	0.545	0.118227	0.581633	0.315534	0.682796	0.55102	0.582915	0.59596	0.549505	0.61809	0.577889	0.684492	0.585859	0.60101	0.625	0.659091	0.542289	0.588832	0.664865	0.565445	0.655914	0.581633	0.507692	0.523077	0.580808	0.625	0.682796	0.684783	0.666667	0.645714	0.10628	0.59596	0.626866	0.547264	0.523077	0.635468	0.593909	0.565445	0.300971	0.585859	0.582915	0.570681	0.684783	0.682796	0.585859	0.613065	0.572917	0.684492	0.682796
MtRab4	0.572139	0.603093	0.356808	0.605	0.67027	0.544041	0.475962	0.432039	0.580488	0.473684	0.466346	0.666667	0.468599	0.105505	0.485577	0.606557	0.57561	0.5	0.657609	0.571429	0.601036	0.463415	0.536458	0.536458	0.468599	0.419048	0.659686	0.663158	0.659459	0.6	0.59799	0.0779817	0.466346	0.57561	0.536458	0.481132	0.495192	0.571429	0.61194	0.468599	0.466346	0.586207	0.673684	0.659686	0.432039	0.433333	0.326923	0.666667	0.659686
MtRab6	0.655914	0.675676	0.644809	0.66129	0.271357	0.672043	0.668449	0.670213	0.657754	0.677249	0.680851	0.256281	0.654255	0.668478	0.634409	0.653179	0.650538	0.690217	0.075	0.668449	0.651934	0.62963	0.66129	0.659459	0.664894	0.645161	0.659686	0.663158	0.07	0.651163	0.67027	0.657609	0.612903	0.650538	0.659459	0.671958	0.684783	0.668449	0.666667	0.659574	0.668449	0.663102	0.657895	0.659686	0.675532	0.643243	0.657459	0.256281	0.659686
MtRab1	0.597015	0.616162	0.441748	0.653465	0.639785	0.551546	0.435407	0.400966	0.609756	0.38785	0.373206	0.652406	0.394231	0.485577	0.0684932	0.615385	0.604878	0.523585	0.612903	0.536946	0.627551	0.398058	0.569948	0.53886	0.394231	0.308756	0.661458	0.680628	0.625668	0.603352	0.616915	0.475962	0.0913242	0.614634	0.53886	0.39726	0.528302	0.536946	0.648515	0.394231	0.416268	0.561576	0.685864	0.661458	0.381643	0.300926	0.445545	0.652406	0.661458
MtRab3	0.0483092	0.535354	0.590244	0.576355	0.620321	0.416244	0.563107	0.568627	0.0809524	0.608696	0.582524	0.638298	0.560976	0.585366	0.604878	0.616216	0.042654	0.583333	0.639785	0.535354	0.621762	0.551724	0.428571	0.408163	0.55122	0.608696	0.677083	0.685864	0.641711	0.593407	0.547264	0.590244	0.604878	0.0758294	0.408163	0.617225	0.605911	0.535354	0.583333	0.556098	0.563107	0.540404	0.685864	0.677083	0.558824	0.597087	0.567164	0.638298	0.677083
MtRab23	0.575758	0.567708	0.5	0.563452	0.681081	0.541667	0.427184	0.455882	0.574257	0.519048	0.441748	0.682796	0.427184	0.480583	0.514286	0.604396	0.584158	0.126761	0.657609	0.546798	0.603093	0.460784	0.541667	0.534031	0.432039	0.495238	0.680628	0.678947	0.659459	0.597765	0.566327	0.490291	0.50237	0.594059	0.534031	0.516588	0.14554	0.546798	0.563452	0.436893	0.417476	0.536946	0.689474	0.680628	0.460784	0.495238	0.460396	0.682796	0.680628
MtRab22	0.525773	0.554974	0.552239	0.544041	0.647059	0.512953	0.546798	0.536946	0.540404	0.595122	0.539216	0.659574	0.561576	0.581281	0.561576	0.625	0.535354	0.52451	0.641711	0.115942	0.623037	0.529703	0.552083	0.505208	0.55665	0.554455	0.697917	0.680628	0.643617	0.624277	0.557292	0.581281	0.568627	0.530303	0.505208	0.590244	0.55665	0.115942	0.549223	0.55665	0.536946	0.0676329	0.691099	0.697917	0.541872	0.569307	0.552764	0.659574	0.692708
MtRab16	0.638298	0.663102	0.67027	0.664894	0.0895522	0.638298	0.666667	0.652632	0.640212	0.680628	0.678947	0.0148515	0.652632	0.672043	0.663102	0.67052	0.643617	0.688172	0.236181	0.659574	0.664835	0.638743	0.62766	0.620321	0.652632	0.668449	0.611399	0.609375	0.24	0.656977	0.663102	0.666667	0.641711	0.638298	0.620321	0.680628	0.682796	0.659574	0.664894	0.652632	0.666667	0.654255	0.609375	0.611399	0.657895	0.66129	0.672131	0.0148515	0.611399
MtRab20	0.547264	0.574359	0.441748	0.605	0.656085	0.533333	0.232227	0.342857	0.556098	0.428571	0.240566	0.668421	0.0518868	0.483092	0.413462	0.595628	0.560976	0.42029	0.648936	0.536946	0.620513	0.342857	0.553846	0.530928	0.0330189	0.394231	0.697436	0.71134	0.650794	0.572222	0.577889	0.483092	0.389423	0.565854	0.530928	0.438679	0.434783	0.536946	0.595	0.0377358	0.222749	0.561576	0.695876	0.697436	0.342857	0.415459	0.455446	0.668421	0.697436
MtRab19	0.537313	0.574359	0.436893	0.6	0.661376	0.523077	0.260664	0.342857	0.546341	0.438095	0.268868	0.668421	0.0188679	0.463768	0.413462	0.584699	0.541463	0.434783	0.643617	0.541872	0.610256	0.347619	0.553846	0.525773	0.0518868	0.399038	0.692308	0.695876	0.645503	0.566667	0.577889	0.463768	0.399038	0.556098	0.525773	0.457547	0.434783	0.541872	0.59	0.0566038	0.251185	0.566502	0.701031	0.692308	0.342857	0.415459	0.450495	0.668421	0.692308
MtRab17	0.545	0.569231	0.441176	0.613065	0.645503	0.538462	0.311005	0.0333333	0.566502	0.432692	0.3	0.652632	0.338095	0.434146	0.393204	0.569061	0.546798	0.429268	0.670213	0.544554	0.582474	0.272727	0.54359	0.520619	0.333333	0.330097	0.670103	0.683938	0.666667	0.55618	0.580808	0.434146	0.393204	0.55665	0.520619	0.419048	0.453659	0.544554	0.60804	0.328571	0.291866	0.544554	0.699482	0.670103	0.0333333	0.35122	0.445	0.652632	0.670103
MtRab18	0.625668	0.672043	0.668478	0.663102	0.0348259	0.647059	0.670213	0.640212	0.62766	0.668421	0.68254	0.114428	0.661376	0.67027	0.645161	0.653179	0.631016	0.675676	0.246231	0.641711	0.640884	0.621053	0.614973	0.623656	0.656085	0.655914	0.625	0.623037	0.245	0.651163	0.666667	0.67027	0.623656	0.625668	0.623656	0.668421	0.681081	0.641711	0.668449	0.650794	0.675532	0.636364	0.623037	0.625	0.645503	0.648649	0.67033	0.114428	0.625
MaRab1	0.579208	0.607143	0.449275	0.643564	0.648649	0.533679	0.408654	0.354369	0.582524	0.336449	0.403846	0.655914	0.415459	0.452381	0.314815	0.583784	0.592233	0.485849	0.632432	0.554455	0.608247	0.395122	0.526042	0.53125	0.42029	0.086758	0.675393	0.684211	0.627027	0.576923	0.61	0.442857	0.314815	0.592233	0.53125	0.351598	0.509434	0.554455	0.650246	0.410628	0.394231	0.559406	0.694737	0.675393	0.34466	0.0502283	0.431373	0.655914	0.675393
MaRab2	0.567164	0.601036	0.358491	0.603015	0.67027	0.536458	0.468599	0.429268	0.573529	0.466346	0.468599	0.666667	0.470874	0.0921659	0.487923	0.60989	0.573529	0.492754	0.663043	0.564356	0.604167	0.470588	0.528796	0.528796	0.470874	0.421053	0.663158	0.668421	0.664865	0.603352	0.59596	0.078341	0.468599	0.573529	0.528796	0.473934	0.487923	0.564356	0.61	0.470874	0.458937	0.579208	0.678947	0.663158	0.429268	0.435407	0.322115	0.666667	0.663158
MaRab3	0.0531401	0.540404	0.590244	0.576355	0.625668	0.42132	0.567961	0.573529	0.0857143	0.613527	0.587379	0.643617	0.556098	0.585366	0.609756	0.616216	0.0379147	0.588235	0.634409	0.540404	0.621762	0.546798	0.433673	0.413265	0.556098	0.613527	0.677083	0.685864	0.636364	0.593407	0.552239	0.590244	0.609756	0.0805687	0.413265	0.62201	0.600985	0.540404	0.583333	0.560976	0.567961	0.545455	0.685864	0.677083	0.563725	0.601942	0.567164	0.643617	0.677083
MaRab4	0.607735	0.641618	0.606557	0.634831	0.66474	0.624277	0.579235	0.563536	0.61413	0.606557	0.57377	0.682081	0.579235	0.606557	0.615385	0.0591133	0.616216	0.601093	0.653179	0.630682	0.427778	0.554945	0.612717	0.624277	0.584699	0.583784	0.597701	0.612717	0.653179	0.095	0.653409	0.595628	0.615385	0.616216	0.624277	0.605405	0.617486	0.630682	0.642458	0.579235	0.584699	0.642045	0.618497	0.597701	0.569061	0.578378	0.605556	0.682081	0.597701
MaRab5	0.54	0.118227	0.576531	0.315534	0.688172	0.55102	0.577889	0.59596	0.544554	0.623116	0.572864	0.68984	0.580808	0.60101	0.62	0.664773	0.537313	0.583756	0.67027	0.570681	0.655914	0.586735	0.507692	0.528205	0.575758	0.625	0.688172	0.690217	0.672043	0.651429	0.101449	0.59596	0.621891	0.542289	0.528205	0.640394	0.588832	0.570681	0.300971	0.580808	0.577889	0.560209	0.690217	0.688172	0.585859	0.613065	0.572917	0.68984	0.688172
MaRab6	0.58794	0.612245	0.441176	0.655	0.630435	0.546875	0.439614	0.395122	0.600985	0.377358	0.376812	0.643243	0.38835	0.475728	0.078341	0.611111	0.600985	0.514286	0.603261	0.527363	0.623711	0.387255	0.565445	0.534031	0.38835	0.302326	0.663158	0.678947	0.616216	0.60452	0.613065	0.466019	0.078341	0.600985	0.534031	0.387097	0.519048	0.527363	0.65	0.38835	0.42029	0.552239	0.684211	0.663158	0.37561	0.294393	0.442786	0.643243	0.663158
MaRab7	0.562814	0.330049	0.605128	0.0970874	0.666667	0.505155	0.606061	0.624365	0.577114	0.631313	0.575758	0.663102	0.598985	0.619289	0.645	0.634286	0.57	0.576531	0.659459	0.588542	0.650538	0.594872	0.492228	0.507772	0.598985	0.64	0.67027	0.661202	0.66129	0.626437	0.338235	0.619289	0.645	0.565	0.507772	0.633663	0.596939	0.588542	0.0970874	0.593909	0.606061	0.557292	0.655738	0.67027	0.614213	0.633166	0.60733	0.663102	0.67027
MaRab8	0.624339	0.632432	0.604167	0.670213	0.646409	0.583784	0.6	0.587629	0.621762	0.608247	0.579487	0.67033	0.610256	0.601036	0.612245	0.405556	0.621762	0.589744	0.635359	0.628272	0.0357143	0.587629	0.589189	0.576087	0.605128	0.615385	0.645161	0.648649	0.631868	0.361582	0.641711	0.595855	0.596939	0.626943	0.576087	0.612245	0.610256	0.628272	0.670213	0.605128	0.594872	0.633508	0.654054	0.645161	0.587629	0.603093	0.590426	0.67033	0.645161
MaRab9	0.613861	0.601036	0.0700935	0.613065	0.664865	0.554404	0.447115	0.456311	0.609756	0.507177	0.451923	0.672043	0.439614	0.361502	0.449275	0.619565	0.621359	0.502415	0.63587	0.569307	0.632124	0.463415	0.567708	0.546875	0.434783	0.430622	0.691099	0.694737	0.637838	0.61326	0.585859	0.366197	0.454106	0.616505	0.546875	0.49763	0.495146	0.569307	0.62	0.434783	0.432692	0.569307	0.7	0.691099	0.456311	0.442308	0.1875	0.672043	0.691099
MaRab10	0.58	0.573684	0.194313	0.591837	0.672131	0.526316	0.463415	0.453202	0.579208	0.485437	0.458537	0.673913	0.45098	0.342857	0.470588	0.60221	0.576355	0.482759	0.648352	0.545455	0.605263	0.445545	0.52381	0.507937	0.446078	0.436893	0.691489	0.687831	0.650273	0.595506	0.564103	0.338095	0.45098	0.581281	0.507937	0.490385	0.490099	0.545455	0.593909	0.446078	0.458537	0.555556	0.698413	0.691489	0.453202	0.443902	0.057971	0.673913	0.691489
MaRab11	0.638298	0.652406	0.654054	0.654255	0.124378	0.632979	0.661376	0.652632	0.640212	0.680628	0.673684	0.049505	0.652632	0.682796	0.663102	0.66474	0.643617	0.682796	0.251256	0.664894	0.664835	0.638743	0.62234	0.620321	0.652632	0.668449	0.621762	0.619792	0.255	0.662791	0.652406	0.677419	0.641711	0.638298	0.620321	0.680628	0.677419	0.664894	0.659574	0.652632	0.661376	0.659574	0.619792	0.621762	0.657895	0.66129	0.655738	0.049505	0.621762
MaRab12	0.569307	0.566327	0.434783	0.58209	0.677249	0.520408	0.179245	0.293839	0.572816	0.469194	0.0610329	0.684211	0.268868	0.466346	0.406699	0.579235	0.582524	0.427885	0.675532	0.529412	0.605128	0.328571	0.548718	0.528205	0.254717	0.38756	0.687179	0.716495	0.671958	0.572222	0.565	0.466346	0.406699	0.572816	0.528205	0.469484	0.444444	0.529412	0.577114	0.245283	0.150943	0.539216	0.701031	0.687179	0.293839	0.403846	0.433498	0.684211	0.687179
MaRab13	0.549505	0.566327	0.429952	0.597015	0.670213	0.510204	0.0377358	0.295238	0.558252	0.452381	0.169811	0.677249	0.232227	0.471154	0.425837	0.579235	0.563107	0.413462	0.663102	0.536946	0.610256	0.325359	0.558974	0.517949	0.218009	0.392344	0.695876	0.720207	0.664894	0.572222	0.57	0.471154	0.421053	0.558252	0.517949	0.448113	0.42029	0.536946	0.59204	0.218009	0.0235849	0.546798	0.704663	0.695876	0.309524	0.403846	0.433498	0.677249	0.695876
MaRab14	0.523316	0.563158	0.56	0.567708	0.650538	0.515625	0.539604	0.544554	0.527919	0.588235	0.536946	0.663102	0.534653	0.559406	0.544554	0.628571	0.538071	0.541872	0.650538	0.00485437	0.636842	0.527363	0.534031	0.507853	0.534653	0.542289	0.701571	0.689474	0.663102	0.627907	0.581152	0.569307	0.536946	0.532995	0.507853	0.583333	0.569307	0.00485437	0.572917	0.529703	0.524752	0.135922	0.7	0.701571	0.544554	0.562189	0.540404	0.663102	0.696335
MaRab15	0.542289	0.569231	0.436893	0.6	0.661376	0.528205	0.236967	0.338095	0.55122	0.428571	0.240566	0.668421	0.0566038	0.478261	0.403846	0.584699	0.556098	0.42029	0.648936	0.53202	0.610256	0.342857	0.548718	0.525773	0.0283019	0.389423	0.702564	0.71134	0.650794	0.561111	0.572864	0.478261	0.379808	0.55122	0.525773	0.429245	0.434783	0.53202	0.59	0.0283019	0.218009	0.55665	0.701031	0.702564	0.338095	0.405797	0.450495	0.668421	0.702564
MaRab16	0.418367	0.505155	0.557292	0.51269	0.631016	0.0505051	0.52551	0.530612	0.424242	0.591837	0.52551	0.62766	0.528205	0.549223	0.551546	0.624277	0.42132	0.528497	0.645161	0.523316	0.578378	0.515464	0.218274	0.0862944	0.538462	0.530928	0.632979	0.66129	0.641711	0.610465	0.520408	0.549223	0.541237	0.42132	0.0913706	0.581633	0.541667	0.523316	0.497462	0.533333	0.515306	0.533679	0.655914	0.632979	0.52551	0.533679	0.52381	0.62766	0.632979
MaRab17	0.597015	0.609137	0.480583	0.631841	0.663158	0.581633	0.451923	0.4375	0.604878	0.132743	0.464115	0.680628	0.423077	0.485577	0.390698	0.60221	0.604878	0.497608	0.666667	0.565854	0.618557	0.429952	0.553846	0.574359	0.408654	0.351852	0.678571	0.682051	0.673684	0.595506	0.605	0.490385	0.396313	0.604878	0.574359	0.13913	0.502392	0.565854	0.638614	0.413462	0.461538	0.570732	0.692308	0.678571	0.427885	0.362791	0.475248	0.680628	0.678571
MaRab18	0.410256	0.497409	0.554974	0.505102	0.629032	0.13198	0.523077	0.517949	0.416244	0.579487	0.512821	0.625668	0.536082	0.520833	0.544041	0.624277	0.413265	0.526042	0.643243	0.526042	0.581522	0.497409	0.204082	0.0406091	0.530928	0.518135	0.636364	0.659459	0.650538	0.610465	0.512821	0.536458	0.533679	0.413265	0.035533	0.574359	0.528796	0.526042	0.489796	0.530928	0.517949	0.53125	0.659459	0.636364	0.512821	0.53125	0.505319	0.625668	0.636364
MaRab19	0.68254	0.68306	0.678947	0.68984	0.614583	0.663102	0.706186	0.690722	0.677083	0.683673	0.697436	0.601036	0.692308	0.670157	0.671875	0.614943	0.677083	0.685864	0.65445	0.6875	0.645161	0.661538	0.631016	0.655914	0.702564	0.677083	0.114428	0.0696517	0.645833	0.584795	0.682796	0.670157	0.671875	0.6875	0.655914	0.683673	0.670157	0.6875	0.68984	0.702564	0.71134	0.703125	0.079602	0.114428	0.690722	0.685864	0.675532	0.601036	0.114428
MaRab20	0.560606	0.588542	0.514706	0.568528	0.675676	0.536458	0.446602	0.455882	0.559406	0.538095	0.466019	0.688172	0.446602	0.490291	0.514286	0.598901	0.569307	0.140845	0.663043	0.541872	0.608247	0.460784	0.541667	0.539267	0.456311	0.504762	0.680628	0.678947	0.664865	0.597765	0.586735	0.5	0.511848	0.579208	0.539267	0.535545	0.169014	0.541872	0.568528	0.461165	0.446602	0.536946	0.689474	0.680628	0.455882	0.509524	0.480198	0.688172	0.680628
MaRab21	0.525773	0.554974	0.552239	0.544041	0.647059	0.512953	0.546798	0.536946	0.540404	0.595122	0.539216	0.659574	0.561576	0.581281	0.561576	0.625	0.535354	0.52451	0.641711	0.115942	0.623037	0.529703	0.552083	0.505208	0.55665	0.554455	0.697917	0.680628	0.643617	0.624277	0.557292	0.581281	0.568627	0.530303	0.505208	0.590244	0.55665	0.115942	0.549223	0.55665	0.536946	0.0676329	0.691099	0.697917	0.541872	0.569307	0.552764	0.659574	0.692708
MaRab22	0.638298	0.657754	0.67027	0.659574	0.0945274	0.638298	0.666667	0.652632	0.640212	0.680628	0.678947	0.019802	0.652632	0.672043	0.663102	0.67052	0.643617	0.688172	0.241206	0.659574	0.664835	0.638743	0.62766	0.620321	0.652632	0.668449	0.611399	0.609375	0.245	0.656977	0.657754	0.666667	0.641711	0.638298	0.620321	0.680628	0.682796	0.659574	0.659574	0.652632	0.666667	0.654255	0.609375	0.611399	0.657895	0.66129	0.672131	0.019802	0.611399
MaRab23	0.545	0.569231	0.441176	0.613065	0.645503	0.538462	0.311005	0.0333333	0.561576	0.432692	0.3	0.652632	0.338095	0.434146	0.393204	0.569061	0.551724	0.429268	0.670213	0.544554	0.582474	0.272727	0.54359	0.520619	0.333333	0.325243	0.670103	0.683938	0.666667	0.55618	0.580808	0.434146	0.393204	0.55665	0.520619	0.419048	0.453659	0.544554	0.60804	0.328571	0.291866	0.539604	0.699482	0.670103	0.0285714	0.346341	0.445	0.652632	0.670103
MaRab24	0.625668	0.672043	0.673913	0.663102	0.0497512	0.647059	0.664894	0.645503	0.62766	0.673684	0.677249	0.124378	0.656085	0.675676	0.650538	0.653179	0.631016	0.675676	0.256281	0.641711	0.640884	0.615789	0.620321	0.623656	0.650794	0.66129	0.625	0.623037	0.255	0.651163	0.666667	0.675676	0.629032	0.625668	0.623656	0.673684	0.681081	0.641711	0.668449	0.645503	0.670213	0.636364	0.623037	0.625	0.650794	0.654054	0.675824	0.124378	0.625
MaRab25	0.537313	0.574359	0.436893	0.6	0.661376	0.523077	0.260664	0.342857	0.546341	0.438095	0.268868	0.668421	0.0188679	0.463768	0.413462	0.584699	0.541463	0.434783	0.643617	0.541872	0.610256	0.347619	0.553846	0.525773	0.0518868	0.399038	0.692308	0.695876	0.645503	0.566667	0.577889	0.463768	0.399038	0.556098	0.525773	0.457547	0.434783	0.541872	0.59	0.0566038	0.251185	0.566502	0.701031	0.692308	0.342857	0.415459	0.450495	0.668421	0.692308
MaRab26	0.664894	0.695652	0.694737	0.696809	0.625	0.648936	0.690722	0.675258	0.666667	0.678571	0.676923	0.606218	0.692308	0.680628	0.666667	0.597701	0.671875	0.685864	0.643979	0.697917	0.650538	0.661538	0.62766	0.647059	0.707692	0.671875	0.0247525	0.14	0.645833	0.569767	0.695187	0.670157	0.661458	0.671875	0.647059	0.673469	0.675393	0.697917	0.68617	0.702564	0.695876	0.697917	0.14	0.0247525	0.675258	0.670157	0.695187	0.606218	0.0247525
MaRab27	0.641711	0.666667	0.641304	0.663102	0.27	0.647059	0.664894	0.677249	0.638298	0.663158	0.666667	0.25	0.634921	0.664865	0.620321	0.653179	0.636364	0.675676	0.075	0.654255	0.648352	0.631579	0.641711	0.639785	0.650794	0.634409	0.645833	0.65445	0.0945274	0.651163	0.655914	0.654054	0.59893	0.636364	0.639785	0.657895	0.67027	0.654255	0.663102	0.645503	0.664894	0.643617	0.649215	0.645833	0.68254	0.621622	0.648352	0.25	0.645833
[truncated: 170 more columns]

## Sheet: Caption
Table. Estimates of Evolutionary Divergence between Sequences
The number of amino acid differences per site from between sequences are shown. This analysis involved 219 amino acid sequences. All ambiguous positions were removed for each sequence pair (pairwise deletion option). There were a total of 340 positions in the final dataset. Evolutionary analyses were conducted in MEGA11 [1]
1. Tamura K., Stecher G., and Kumar S. (2021). MEGA 11: Molecular Evolutionary Genetics Analysis Version 11. Molecular Biology and Evolution https://doi.org/10.1093/molbev/msab120.
Disclaimer: Although utmost care has been taken to ensure the correctness of the caption, the caption text is provided "as is" without any warranty of any kind. Authors advise the user to carefully check the caption prior to its use for any purpose and report any errors or problems to the authors immediately (www.megasoftware.net). In no event shall the authors and their employers be liable for a…
